# Supplementary material for: Five colour variants of bright luminescent protein for real-time multicolour bioimaging
Source: PubMed Central journal article supplement (PMC5171807; doi:10.1038/ncomms13718), 2016-12-14
Supplement: ncomms13718-s1.pdf [file ncomms13718-s1.pdf]

1 **Supplementary Figure 1. Design of linker truncation library between**  
 2 **Nluc and either Venus or mNeonGreen**  
 3

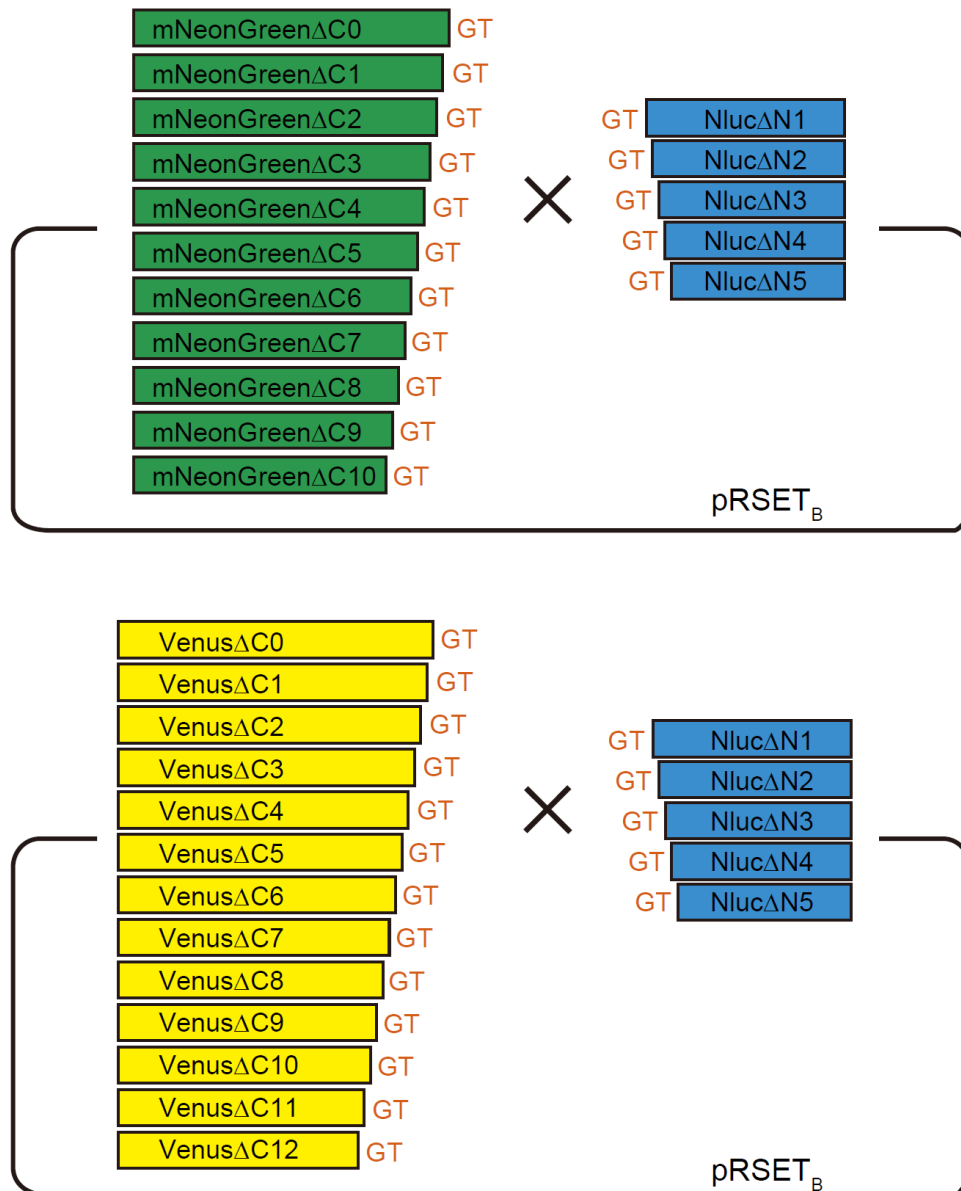

4  
 5 The cDNA of C-terminally deleted FPs (mNeonGreen or Venus) mutants  
 6 and N-terminally deleted Nluc mutants with two residues GT (highlighted  
 7 in orange color), derived from the recognition sequence of *KpnI* (ggtacc),  
 8 were mixed together, and subcloned in-frame into the *BamHI/EcoRI* sites  
 9 of pRSET<sub>B</sub>. We generated and screened 55 and 65 linker combinations of  
 10 mNeonGreen-Nluc and Venus-Nluc pairs, respectively.

11 **Supplementary Figure 2. Emission spectra of linker truncation**  
12 **variants of mNeonGreen-Nluc and Venus-Nluc**

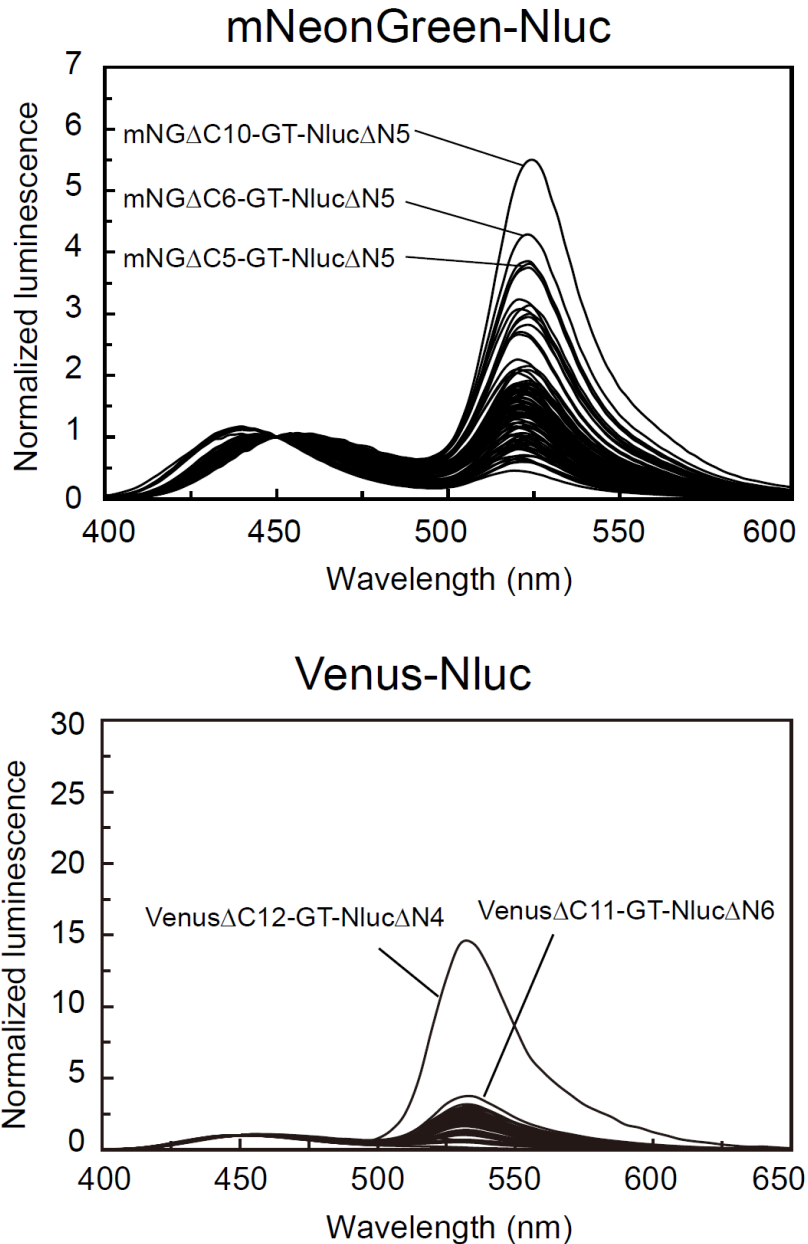

13  
14 Luminescence spectra of *E. coli* suspension colonies that showed bright  
15 luminescence signal on an agar plate at first screening. The spectra were  
16 normalized to the peak of Nluc emission intensity. Spectra were measured  
17 by micro-plate reader (SH-9000; Corona Electric). Among them,  
18 mNeonGreen $\Delta$ C10-GT-Nluc $\Delta$ N5 and Venus $\Delta$ C12-GT-Nluc $\Delta$ N4 exhibited  
19 high FRET efficiency.

20 **Supplementary Figure 3. Design of randomized linker library in**  
 21 **mNeonGreen-Nluc and Venus-Nluc fusion protein**

22  
 23  
 24

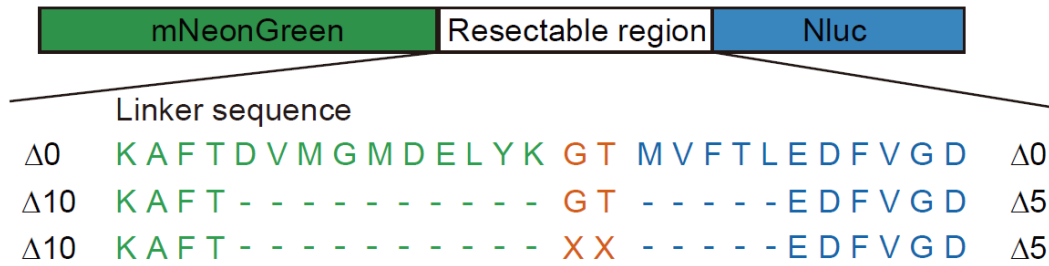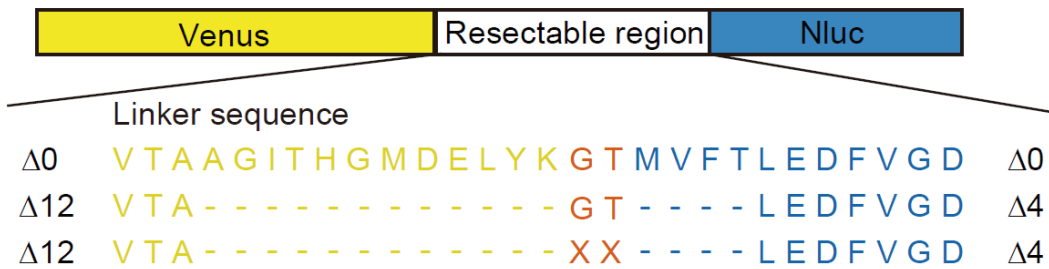

25  
 26  
 27  
 28  
 29  
 30  
 31  
 32  
 33  
 34  
 35

Using mNeonGreen $\Delta$ C10-GT-Nluc $\Delta$ N5 and Venus $\Delta$ C12-GT-Nluc $\Delta$ N4 as templates, we performed site-directed random mutagenesis at the linker region, -Gly-Thr-.

36 **Supplementary Figure 4. Emission spectra of randomized linker**  
37 **variants in mNeonGreen-Nluc and Venus-Nluc fusion protein**

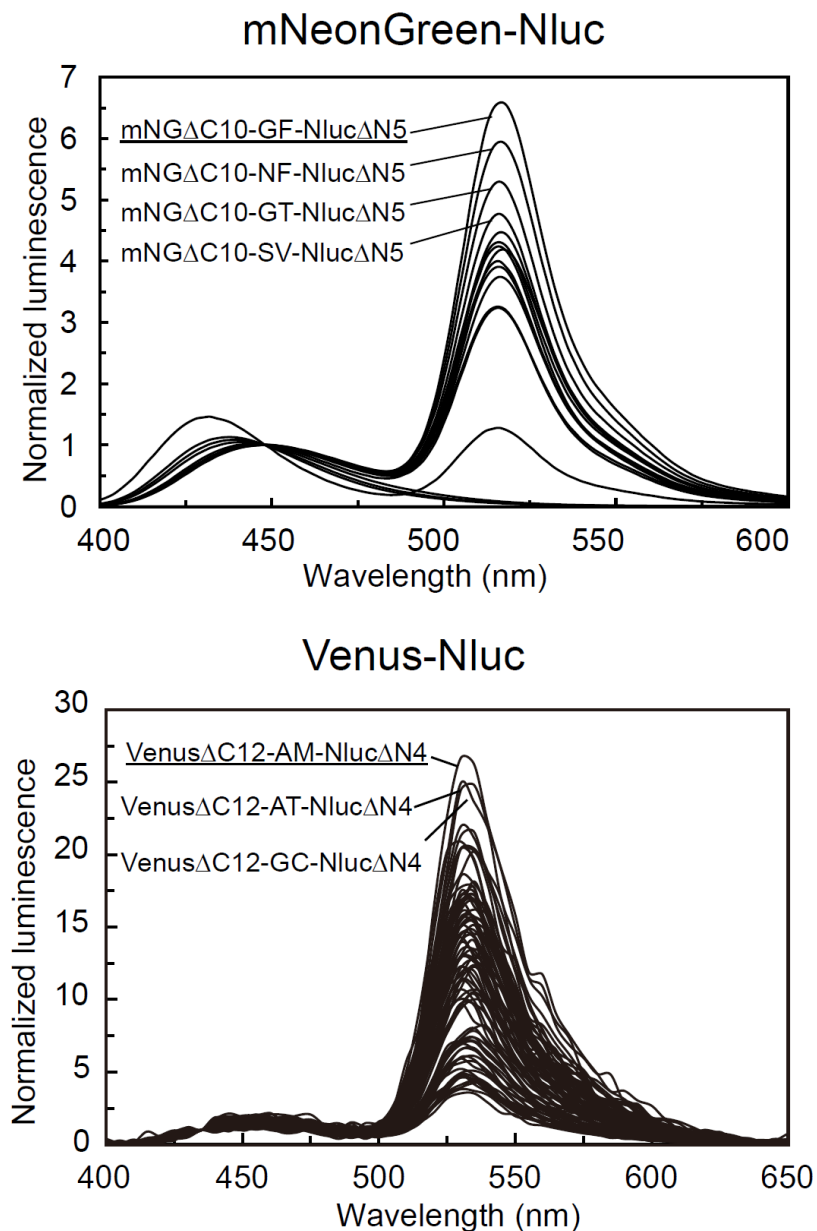

38

39 Luminescence spectra of *E. coli* suspension of colonies that showed bright  
40 luminescence signal on an agar plate at first screening. The spectra were  
41 normalized to the peak of Nluc emission intensity. Spectra were measured  
42 by micro-plate reader (SH-9000; Corona Electric).  
43 mNG $\Delta$ C10-GF-Nluc $\Delta$ N5 (GeNL) and Venus $\Delta$ C12-AM-Nluc $\Delta$ N4 (YeNL)  
44 exhibited the highest FRET efficiency.

45 **Supplementary Figure 5. Design of linker library in mTurquoise2-Nluc**  
 46 **and tdTomato-Nluc fusion protein**

47  
 48  
 49

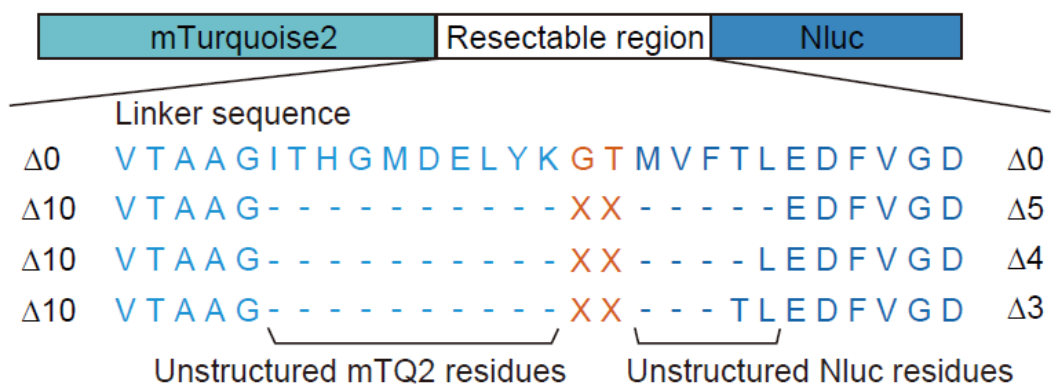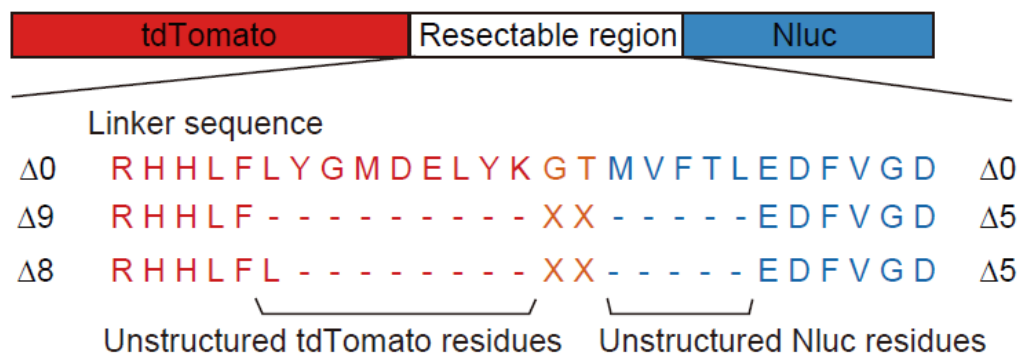

50  
 51  
 52  
 53  
 54  
 55  
 56  
 57

In the mTurquoise2-Nluc and tdTomato-Nluc pair, we created a series of linker libraries by systematically truncating resectable regions and randomizing two residues at the junction simultaneously. Those libraries with different linker lengths were mixed together and screened.

58 **Supplementary Figure 6. Emission spectra of linker library in**  
59 **tdTomato-Nluc fusion protein**

60  
61  
62  
63

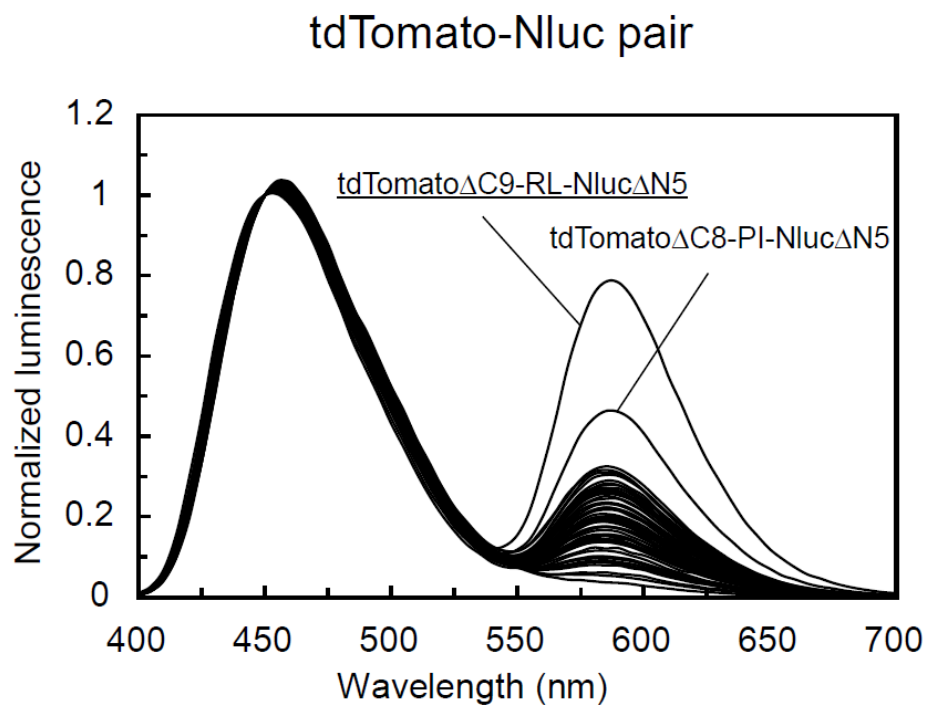

64  
65  
66  
67  
68  
69  
70  
71  
72  
73  
74

Luminescence spectra of *E. coli* suspension of colonies that showed bright luminescence signal on an agar plate at first screening. The spectra were normalized to the peak of Nluc emission intensity. Spectra were measured by micro-plate reader (SH-9000; Corona Electric). Among them, tdTomato $\Delta$ C9-RL-Nluc $\Delta$ N5 (ReNL) exhibited the highest FRET efficiency.

75 **Supplementary Figure 7. Design of Orange eNano-lantern**

76

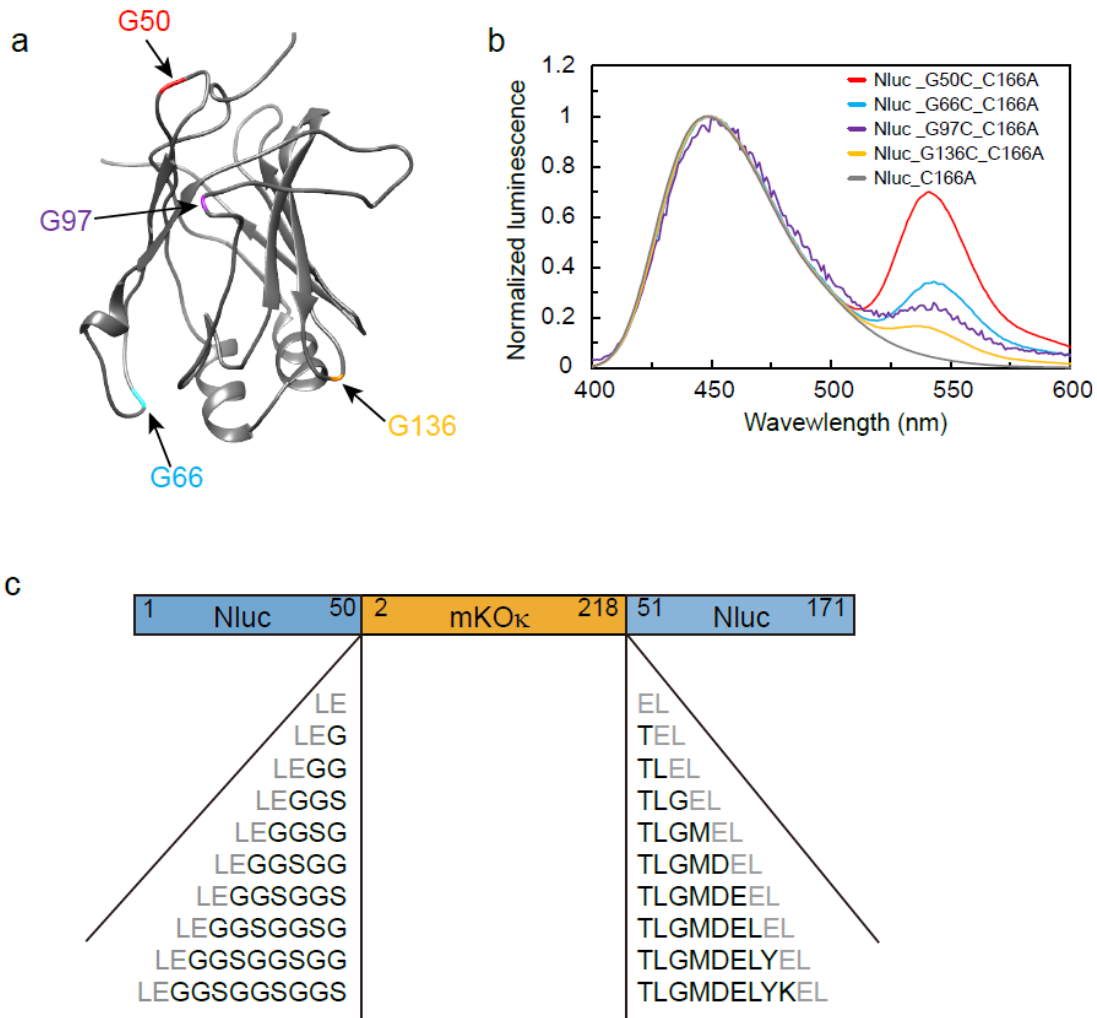

77

78

79 (a) 3D structure of Nluc predicted by I-TASSER with the positions of  
 80 cysteine insertion (50, 66, 97 and 136th). (b) Luminescence spectra of Nluc  
 81 conjugated with eosin-maleimide at designated cysteine. Each cysteine  
 82 substitution was introduced to mutated Nluc whose intrinsic cysteine  
 83 residue was substituted with alanine (C166A). (c) The flexible linker was  
 84 introduced to flank mKOκ. Typical Glycine-rich linkers and mimics of  
 85 GFP C-terminal 10 amino acids were employed as flexible linkers at the  
 86 N-terminus and C-terminus of mKOκ, respectively. All possible  
 87 combinations were screened.





89 **Supplementary Figure 8. Emission spectra of FRET proteins based on**  
90 **the design of OeNL**

91  
92  
93  
94

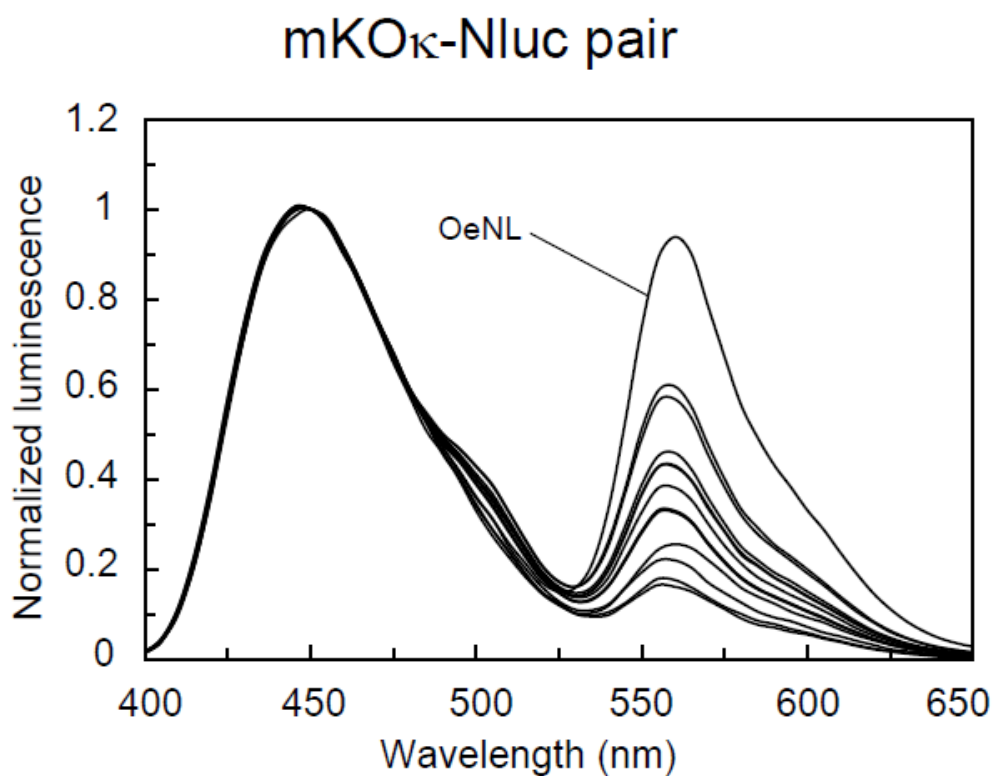

95  
96  
97  
98  
99  
100  
101  
102  
103

Luminescence spectra of *E. coli* colony suspensions showing the brightest luminescence signal on initial agar plate screening. The spectra measured by micro-plate reader (SH-9000; Corona Electric) and were normalized to the peak of Nluc emission intensity.

104 **Supplementary Figure 9. Characterization of luminescent proteins**

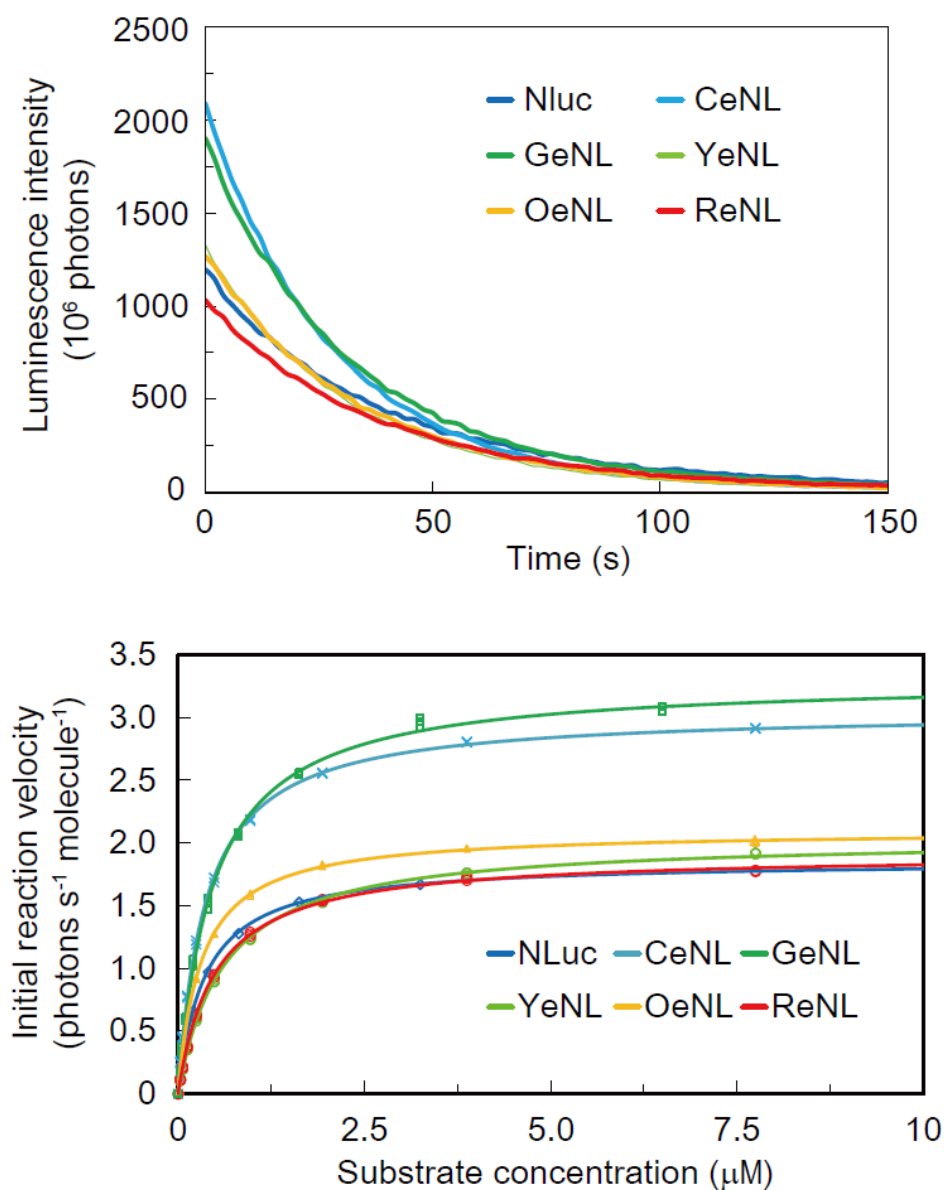

105

106

107 (a) Quantum yield was estimated from the integrated light output for 200 s  
 108 until reaction of 500 pM of furimazine with 1 nM luminescent protein  
 109 approached completion. Intensities were measured in triplicate, and data  
 110 are presented as mean. (b) Kinetics parameters were estimated from the  
 111 plot of the initial light output (first 12 second integration) versus the  
 112 concentration of the furimazine. All intensities were measured in triplicate,  
 113 and the average data were fitted to Michaelis-Menten equation. The results  
 114 are summarized in Table S3.

115 **Supplementary Figure 10. Single-cell imaging of HeLa cells expressing**  
116 **CeNL localized to various cellular compartments**  
117

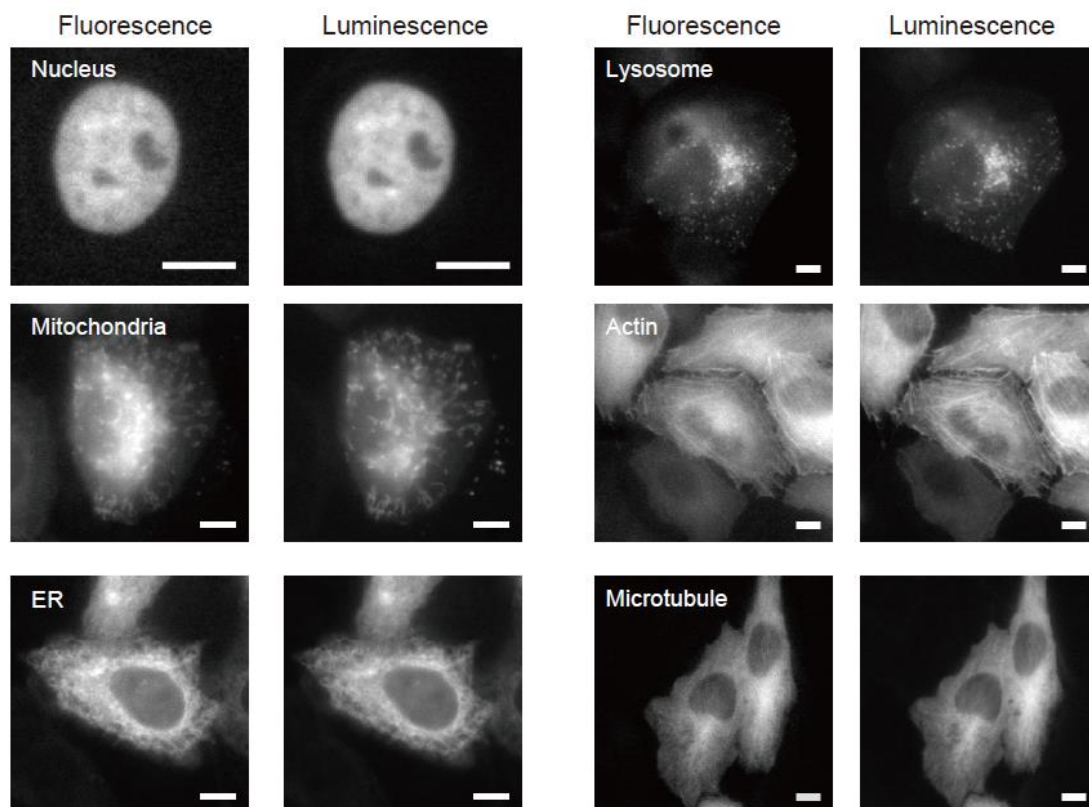

118  
119  
120  
121  
122  
123  
124  
125  
126  
127

Fluorescence images (left) of mTurquoise2 moiety in CeNL and luminescence images (right) of CeNL localized to the nucleus, mitochondria, ER, lysosome, actin, and microtubule (exposure times for luminescence image acquisition times were 2 s, 20 s, 5 s, 10 s, 20 s, and 5 s, respectively). Scale bars, 10  $\mu$ m.

128 **Supplementary Figure 11. Single-cell imaging of HeLa cells expressing**  
129 **YeNL localized to various cellular compartments**  
130  
131

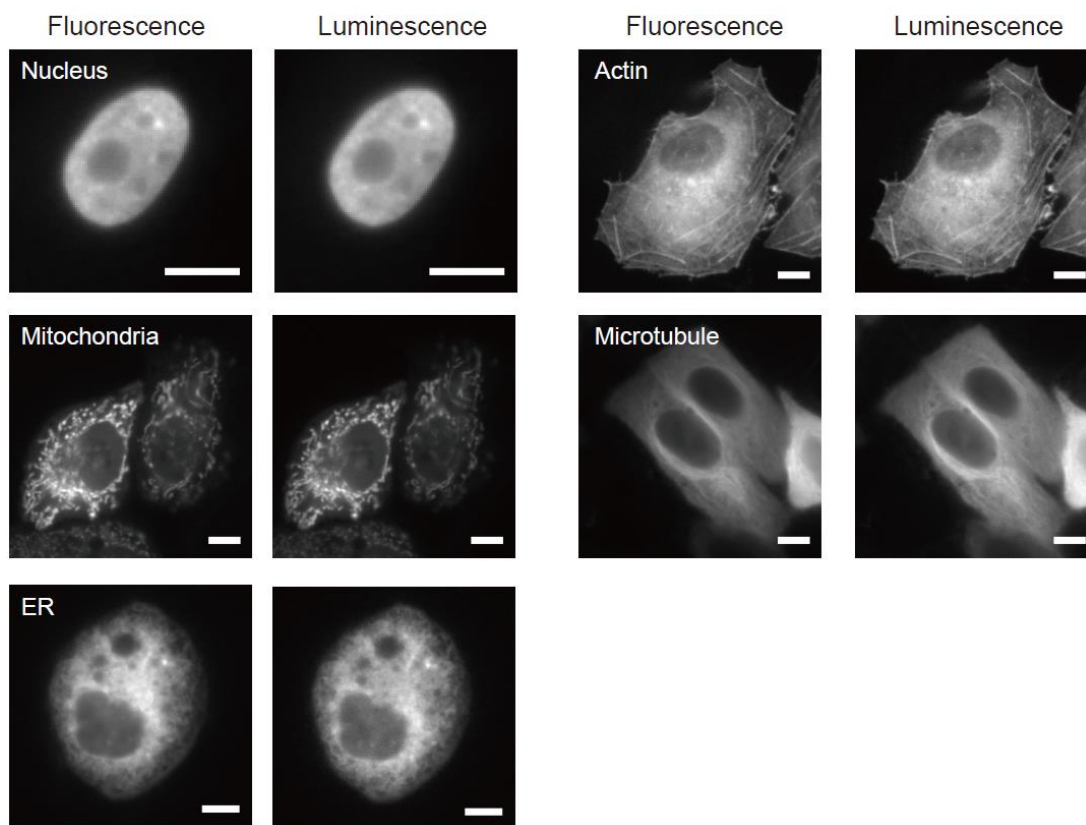

132  
133  
134  
135  
136 Fluorescence images (left) of the Venus moiety in YeNL and luminescence  
137 images (right) of YeNL localized to the nucleus, mitochondria, ER, actin,  
138 and microtubule (exposure times for luminescence images were 5 s, 5 s, 5 s,  
139 5 s, and 10 s, respectively). Scale bars, 10  $\mu$ m.  
140  
141

142 **Supplementary Figure 12. Single-cell imaging of HeLa cells expressing**  
143 **OeNL localized to various cellular compartments**

144

145

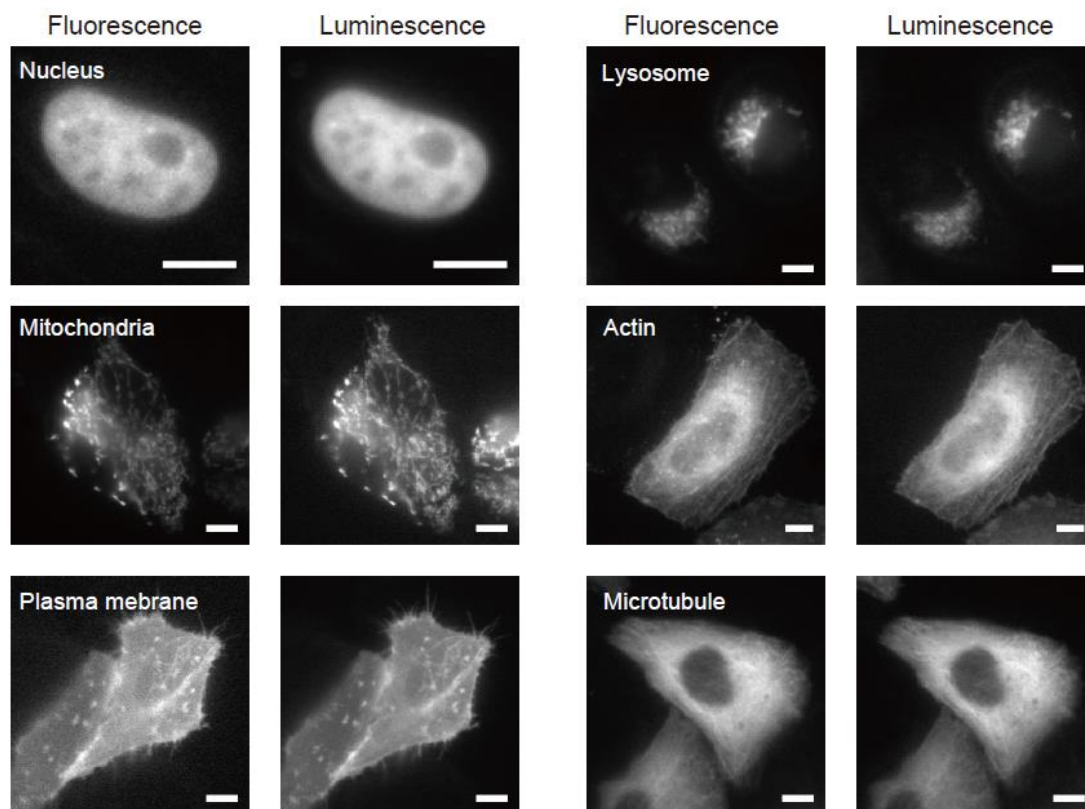

146

147

148

149

150 Fluorescence images (left) of mKOκ moiety in OeNL and luminescence  
151 images (right) of OeNL localized to the nucleus, mitochondria, plasma  
152 membrane, lysosome, actin, and microtubule (exposure time for  
153 luminescence images were 3 s, 10 s, 10 s, 5 s, 10 s, and 5 s, respectively).  
154 Scale bars, 10 μm.

155

156

157 **Supplementary Figure 13. Single-cell imaging of HeLa cells expressing**  
158 **ReNL localized to various cellular compartments**

159

160

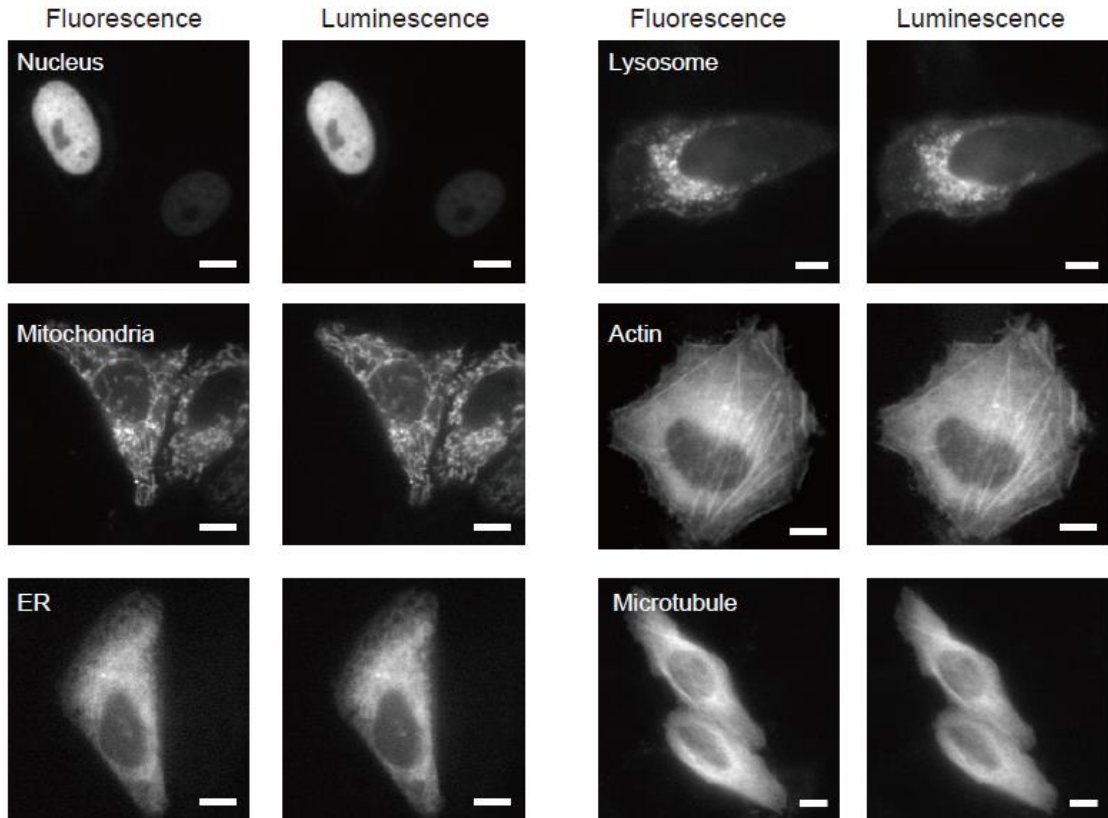

161

162

163

164

165 Fluorescence images (left) of the tdTomato moiety in ReNL and  
166 luminescence images (right) of ReNL localized to the nucleus,  
167 mitochondria, ER, lysosome, actin, and microtubule (exposure time for  
168 luminescence images were 3 s, 10 s, 10 s, 5 s, 10 s, and 5 s, respectively).  
169 Scale bars, 10  $\mu\text{m}$ .

170

171

172 **Supplementary Figure 14. Multi-color luminescence imaging with**  
 173 **linear unmixing**

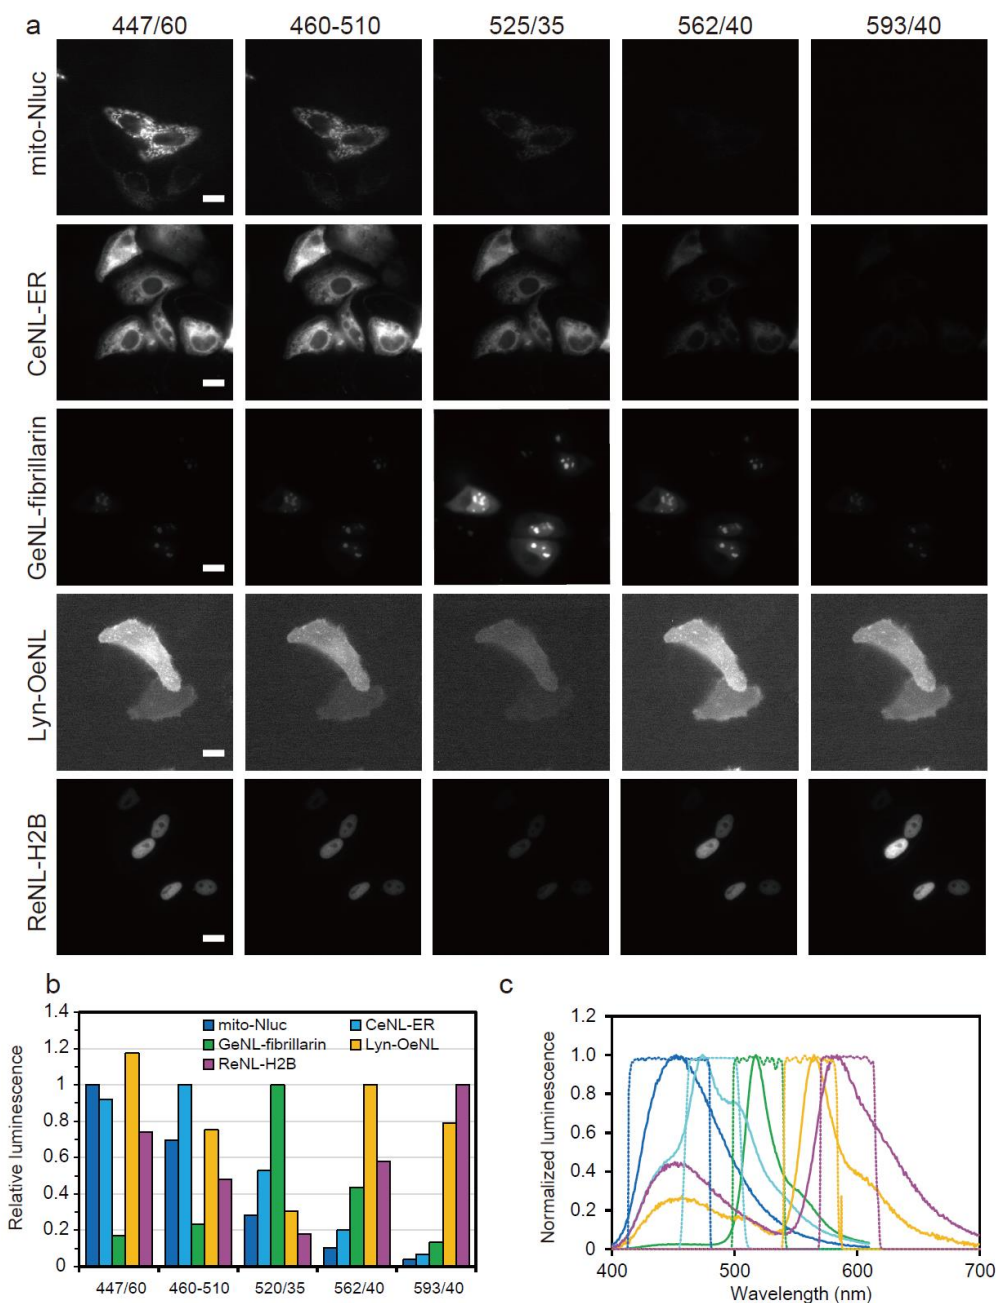

174  
 175 (a) HeLa cells expressing either mito-Nluc, CeNL-ER, GeNL-fibrillarin  
 176 Lyn-OeNL or ReNL-H2B were imaged with five filters. Scale bars, 20  $\mu$ m.  
 177 (b) Linear spectral unmixing coefficient was determined from the control  
 178 experiments as in **a**. (c) The emission spectra of Nluc, CeNL, GeNL, OeNL,  
 179 and ReNL. Dashed line represents the emission filters used to acquire each  
 180 luminescent protein signal.

181 **Supplementary Figure 15. Identification of optimal insertion site of**  
 182 **CaM-M13 into Nluc**

183

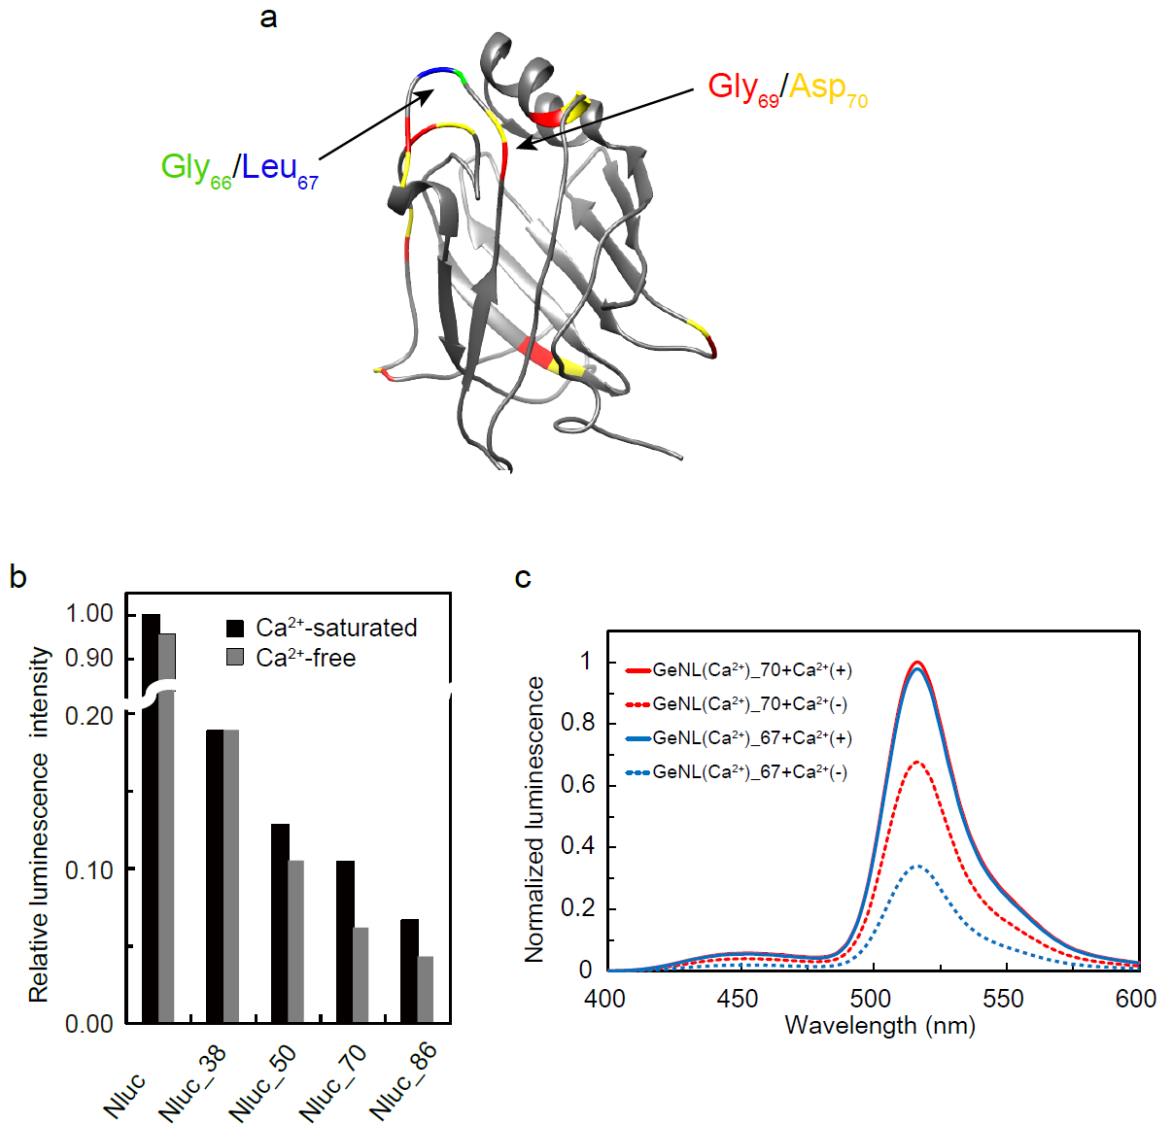

184

185 (a) 3D structure of Nluc predicted by I-TASSER with the candidate

186 CaM-M13 insertion sites (37/38, 63/64, 69/70, 97/98, 103/104, 107/108,

187 121/122 and 148/149th with red and yellow color) and final optimal

188 insertion site at 66/67th of GeNL(Ca<sup>2+</sup>) with green and blue color. (b)

189 Relative brightness of Nluc\_CaM-M13 protein extracted from periplasmic

190 region with or without Ca<sup>2+</sup>. (c) Normalized luminescence spectra of

191 GeNL(Ca<sup>2+</sup>)\_67 and GeNL(Ca<sup>2+</sup>)\_70 with or without Ca<sup>2+</sup>.

192



193 **Supplementary Figure 16. Direct comparison of GeNL(Ca<sup>2+</sup>) and**  
194 **either GCaMP3 or Fura-2**  
195

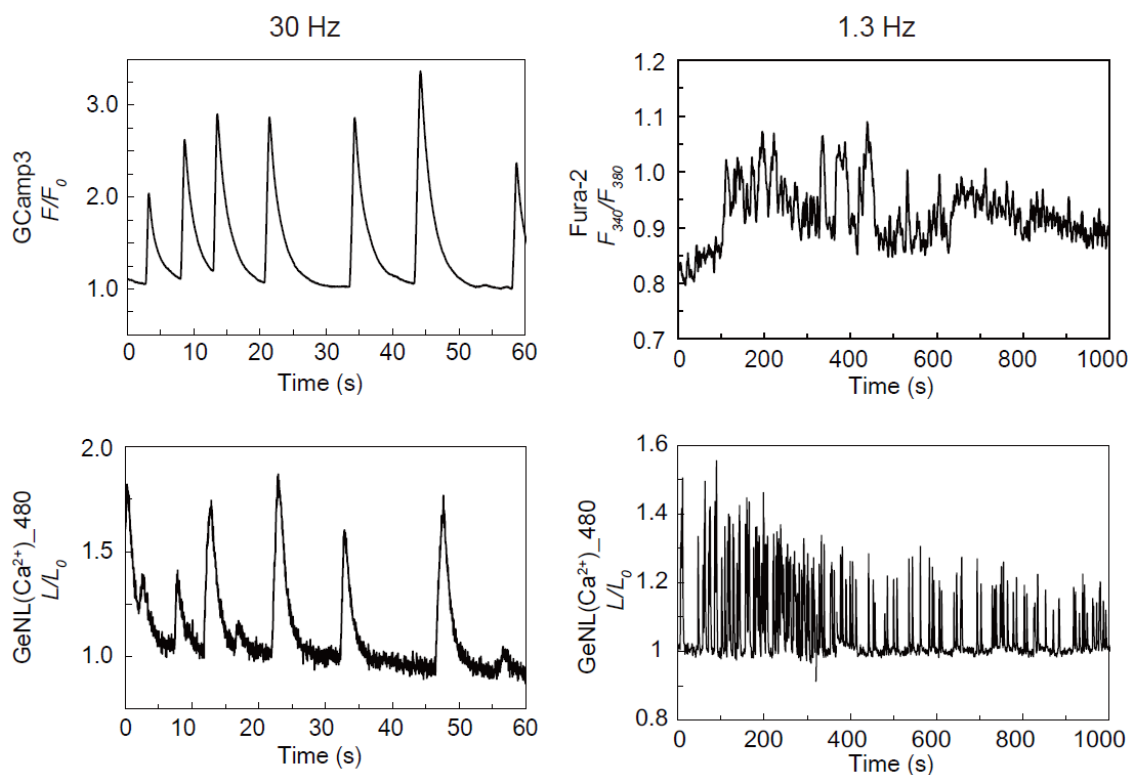

196

197

198 Spontaneous Ca<sup>2+</sup> spiking in GH3 cells were monitored with the indicators  
199 (vertical axis) at designated frame rate (Upper). Illumination power was  
200 130 mW cm<sup>-2</sup> for GCaMP3, 100 mW cm<sup>-2</sup> (384 nm) and 34 mW cm<sup>-2</sup> (340  
201 nm) for dual excitation ratio imaging of Fura-2. The background drift was  
202 manually subtracted using Origin7 software (OriginLab)

203

204

205

**Supplementary Table 1. Enzymatic characteristics of luminescent proteins**

|                    | <i>LQY</i><br>(%) | $K_m$<br>( $\mu\text{M}$ ) | $V_{\text{max}}$<br>(photon $\text{s}^{-1}$ molecule $^{-1}$ ) | $k_{\text{cat}}$<br>( $\text{s}^{-1}$ ) |
|--------------------|-------------------|----------------------------|----------------------------------------------------------------|-----------------------------------------|
| Nluc               | 28 $\pm$ 3.0      | 0.36 $\pm$ 0.0038          | 1.9 $\pm$ 0.0061                                               | 6.6 $\pm$ 0.73                          |
| CeNL               | 42 $\pm$ 1.1      | 0.37 $\pm$ 0.0042          | 3.0 $\pm$ 0.010                                                | 7.1 $\pm$ 0.19                          |
| GeNL               | 45 $\pm$ 1.8      | 0.47 $\pm$ 0.010           | 3.3 $\pm$ 0.021                                                | 7.3 $\pm$ 0.30                          |
| YeNL               | 33 $\pm$ 1.1      | 0.61 $\pm$ 0.0088          | 2.0 $\pm$ 0.088                                                | 6.1 $\pm$ 0.34                          |
| OeNL               | 30 $\pm$ 0.48     | 0.31 $\pm$ 0.0025          | 2.1 $\pm$ 0.043                                                | 7.0 $\pm$ 0.18                          |
| ReNL               | 26 $\pm$ 1.0      | 0.49 $\pm$ 0.0064          | 1.9 $\pm$ 0.069                                                | 7.3 $\pm$ 0.20                          |
| Rluc8 <sup>a</sup> | 5.8 $\pm$ 0.63    | 2.0 $\pm$ 0.057            | 0.22 $\pm$ 0.0018                                              | 3.8 $\pm$ 0.12                          |

206

207 LQY, luminescent quantum yield. Data are presented as mean  $\pm$  s.d., n = 3.208 <sup>a</sup> measured with 0.1% BSA

209

210

**Supplementary Table 2. Affinity for Ca<sup>2+</sup> of GeNL(Ca<sup>2+</sup>) variants**

|                             | Linker of<br>CaM and M13 | Dynamic range<br>/ % | Relative<br>luminescence | K <sub>d</sub> / nM | Hill coefficient |
|-----------------------------|--------------------------|----------------------|--------------------------|---------------------|------------------|
| GeNL(Ca <sup>2+</sup> )_520 | 104Q-2G                  | 280                  | 1                        | 520                 | 1.5              |
| GeNL(Ca <sup>2+</sup> )_480 | 104Q-2GS                 | 490                  | 0.87                     | 480                 | 1.2              |
| GeNL(Ca <sup>2+</sup> )_250 | 104Q-3GS                 | 190                  | 0.79                     | 260                 | 1.2              |
| GeNL(Ca <sup>2+</sup> )_60  | 104E-4GS                 | 270                  | 0.76                     | 56                  | 1.1              |

211

212

Supplementary Table 3. Oligonucleotides used in this study

| Name of primer           | Oligonucleotide sequence (5' to 3')                       |
|--------------------------|-----------------------------------------------------------|
| F-BH1-G-gfp_1            | TTGGATCCGATGGTGAAGCAAGGGCGAGGAG                           |
| R-ER1-Nluc_171           | ATGAATTCGCCAGAATGCGTTCGCACAG                              |
| F-Kpn1-Nluc_2            | GCCGGTACCGTCTTCACACTCGAAGATTTTCG                          |
| F-Kpn1-Nluc_3            | GCCGGTACCTTCACACTCGAAGATTTTCGTTG                          |
| F-Kpn1-Nluc_4            | GCCGGTACCACACTCGAAGATTTTCGTTGGG                           |
| F-Kpn1-Nluc_5            | GCCGGTACCCTCGAAGATTTTCGTTGGGGAC                           |
| F-Kpn1-Nluc_6            | GCCGGTACCGAAGATTTTCGTTGGGGACTGGC                          |
| R-Kpn1-mNG_235           | GCCGGTACCGTACAGCTCGTCCATGCCATC                            |
| R-Kpn1-mNG_234           | GCCGGTACCAGCTCGTCCATGCCATCAC                              |
| R-Kpn1-mNG_233           | GCCGGTACCCTCGTCCATGCCATCACATCG                            |
| R-Kpn1-mNG_232           | GCCGGTACCGTCCATGCCATCACATCGG                              |
| R-Kpn1-mNG_231           | GCCGGTACCCATGCCATCACATCGGTAAAG                            |
| R-Kpn1-mNG_230           | GCCGGTACCGCCATCACATCGGTAAAGGCC                            |
| R-Kpn1-mNG_229           | GCCGGTACCCATCACATCGGTAAAGGCCTTTTGC                        |
| R-Kpn1-mNG_228           | GCCGGTACCACATCGGTAAAGGCCTTTTGC                            |
| R-Kpn1-mNG_227           | GCCGGTACCATCGGTAAAGGCCTTTTGCAC                            |
| R-Kpn1-mNG_226           | GCCGGTACCGGTAAAGGCCTTTTGCCTCC                             |
| F-XX-Nluc_6              | NNKNNKGAAGATTTTCGTTGGGACTGG                               |
| R-mNG_226                | GGTAAAGGCCTTTTGCCTCC                                      |
| R-Kpn1-gfp_229           | ATGGTACCCCCGGCGCGGTACGAAC                                 |
| F-XX-Nluc_5              | NNKNNKGAAGATTTTCGTTGGGACTG                                |
| F-XX-Nluc_4              | NNKNNKCTCGAAGATTTTCGTTGGGG                                |
| F-XX-Nluc_3              | NNKNNKACACTCGAAGATTTTCGTTG                                |
| R-gfp_229                | CCCGGCGGCGGTACGAAC                                        |
| F-XhoI-mKO_2             | ATTCTCGAGGTGAGCGTGATCAA                                   |
| F-XhoI-G-mKO_2           | ATTCTCGAGGGCGGTGAGCGTGATCAAGC                             |
| F-XhoI-GG-mKO_2          | ATTCTCGAGGGCGGTGAGCGTGATCAAGC                             |
| F-XhoI-GGS-mKO_2         | ATTCTCGAGGGCGGTAGCGTGAGCGTGATCAAGC                        |
| F-XhoI-GGSG-mKO_2        | ATTCTCGAGGGCGGTAGCGGTGGCGTGAGCGTGATCAAGCCCCGA             |
| F-XhoI-GGSGGS-mKO-2      | ATTCTCGAGGGCGGTAGCGGTGGCAGCGTGAGCGTGATCAAGCCCCGA          |
| F-XhoI-GGSGGSG-mKO-2     | ATTCTCGAGGGCGGTAGCGGTGGCAGCGGAGTGAGCGTGATCAAGCCCCGA       |
| F-XhoI-GGSGGSGG-mKO-2    | ATTCTCGAGGGCGGTAGCGGTGGCAGCGGAGGTGAGCGTGATCAAGCCCCGA      |
| F-XhoI-GGSGGSGGS-mKO-2   | ATTCTCGAGGGCGGTAGCGGTGGCAGCGGAGGTAGCGTGAGCGTGATCAAGCCCCGA |
| R-Sac1-mKO_218           | ATTGAGCTCGGAGTGGGCCACGGCG                                 |
| R-Sac1-T-mKO_218         | ATTGAGCTCAGTGGAGTGGGCCACGGCG                              |
| R-Sac1-TL-mKO_218        | ATTGAGCTCGAGAGTGGAGTGGGCCACGGCG                           |
| R-Sac1-TLG-mKO_218       | ATTGAGCTCGCCGAGAGTGGAGTGGGCCACGGCG                        |
| R-Sac1-TLGM-mKO_218      | ATTGAGCTCCATGCCGAGAGTGGAGTGGGCCACGGCG                     |
| R-Sac1-TLGMDE-mKO_218    | ATTGAGCTCCTCGTCCATGCCGAGAGTGGAGTGGGCCACGGCG               |
| R-Sac1-TLGMDEL-mKO_218   | ATTGAGCTCCAGCTCGTCCATGCCGAGAGTGGAGTGGGCCACGGCG            |
| R-Sac1-TLGMDELY-mKO_218  | ATTGAGCTCGTACAGCTCGTCCATGCCGAGAGTGGAGTGGGCCACGGCG         |
| R-Sac1-TLGMDELYK-mKO_218 | ATTGAGCTCCTGTACAGCTCGTCCATGCCGAGAGTGGAGTGGGCCACGGCG       |
| R-Kpn1-tdTA_467          | GCCGGTACCCAGGAACAGGTGGTGGCGGCC                            |
| F-Nluc                   | GGGACTGGCGACAGACAGCCG                                     |
| R-Nluc_6-XX-tdTA_467     | CAACGAAATCTTCMNNMNNCAGGAACAGGTGGTG                        |
| R-Nluc_6-XX-tdTA_466     | CAACGAAATCTTCMNNMNNGAACAGGTGGTG                           |
| R-Nluc_6-XX-tdTA_465     | CAACGAAATCTTCMNNMNNCAGGTGGTGGCG                           |
| F-Sac1-Nluc_38           | GCCGAGCTCGTGTCCGTAACCTCCGATCCAAAG                         |
| R-Nco1-Nluc_37           | GAACCATGGCCCCGAGATTCTGAAACAACTG                           |
| F-Sac1-Nluc_64           | GCCGAGCTCTATGAAGTCTGAGCGGCGAC                             |
| R-Nco1-Nluc_63           | GAACCATGGCGGGATGATGACATGGATGTC                            |
| F-Sac1-Nluc_67           | GCCGAGCTCCTGAGCGGCGACCAATGGGC                             |
| R-Nco1-Nluc_66           | GAACCATGGACCTTCATACGGGATGATGAC                            |

|                     |                                                    |
|---------------------|----------------------------------------------------|
| F-Sac1-Nluc_70      | GCCGAGCTCGACCAAATGGGCCAGATC                        |
| R-Nco1-Nluc_69      | GAACCATGGGCGCTCAGACCTTCATACGG                      |
| F-Sac1-Nluc_98      | GCCGAGCTCACACTGGTAATCGACGGGG                       |
| R-Nco1-Nluc_97      | GAACCATGGGCCATAGTGCAGGATCACC                       |
| F-Sac1-Nluc_104     | GCCGAGCTCGTTACGCCGAACATGATC                        |
| R-Nco1-Nluc_103     | GAACCATGGCCCCGTCGATTACCAGTGTG                      |
| F-Sac1-Nluc_108     | GCCGAGCTCATGATCGACTATTTTCGGACGG                    |
| R-Nco1-Nluc_107     | GAACCATGGGTTCGGCGTAACCCCGTC                        |
| F-Sac1-Nluc_122     | GCCGAGCTCTTCGACGGCAAAAAGATCACTG                    |
| R-Nco1-Nluc_121     | GAACCATGGCACGGCGATGCCTTCATAC                       |
| F-Sac1-Nluc_149     | GCCGAGCTCGGCTCCCTGCTGTTCCGAG                       |
| R-Nco1-Nluc_148     | GAACCATGGGTTCGGGGTTGATCAGGCGCTC                    |
| F-BH1-koz-hmNG      | ATGGATCCCGCCACCATGGTGTCCAAGGGCGAAGAG               |
| F-BH1-G-hmNG        | ATGGATCCGATGGTGTCCAAGGGCGAAGAG                     |
| F-BH1-hmNG          | ATGGATCCATGGTGTCCAAGGGCGAAGAG                      |
| F-Kpn1-hmNG_2       | ATGGTACCGTGTCCAAGGGCGAAGAG                         |
| F-Hind3-koz-hmNG_1  | ATAAGCTTCGCCACCATGGTGTCCAAGGGCGAAGAG               |
| F-Sal1-link-hmNG_1  | ATGTCGACGGTACCGCGGGCCGGGATCCAATGGTGTCCAAGGGCGAAGAG |
| F-Nhe1-koz-hmNG_1   | ATGCTAGCCGCCACCATGGTGTCCAAGGGCGAAGAGG              |
| R-Xho1-x-Nluc_171   | ATCTCGAGTTACGCCAGAATGCGTTTCGCACAG                  |
| R-ER1-x-Nluc_171    | ATGAATTCTTACGCCAGAATGCGTTTCGCACAG                  |
| R-Nluc_171-ER1      | ATGAATTCGCCAGAATGCGTTTCGCACAG                      |
| R-Kpn1-Nluc_171     | TATGGTACCCGCCAGAATGCGTTTCGCACAG                    |
| R-Kpn1-GSG-Nluc_171 | ATGGTACCGCCTGATCCACCCGCCAGAATGCGTTTCGCACAG         |
| R-Not1-x-Nluc_171   | ATGCGGCCGCTTACGCCAGAATGCGTTTCGC                    |
| R-Bgl2-Nluc_171     | ATTAGATCTCGCCAGAATGCGTTTCGCACAG                    |
| F-Sal1-GS10 linker  | TCGACCGGATCTGGCGGCGGAGGAAGCGGAGGG                  |
| R-Sal1-GS10 linker  | TCGACCTCCGCTTCTCCGCCGCCAGATCCGG                    |
| F- BH1-koz-gfp_1    | ATGGATCCCCACCATGGTGTGAGCAAGGGCGAGGAG               |
| F-Hind3-koz-gfp_1   | ATAAGCTTCGCCACCATGGTGTGAGCAAGGGCGAGGAG             |
| F- BH1-gfp_1        | TTGGATCCATGGTGTGAGCAAGGGCGAGGAG                    |
| F-GS-VCL_2          | GGAGGCGGAGGATCAGGCGGATCTGGGCCGCTTCCACACGCGCAC      |
| F-Kpn1-GS           | ATGGTACCGGCGGCGGAGGAAGCGGAGGCGGAGGATCAGGCGGATC     |
| R-ER1-x-VCL_1066    | ATGAATTCTTACTGATACCATGGGGTCTTTC                    |
| F-Hind3-koz-LAMP_1  | ATAAGCTTCGCCACCATGGCGGCCCGGGCGCCCGG                |
| R-Kpn1-LAMP_407     | ATGGTACCGATGGTCTGATAGCCCGGTGAC                     |
| F-BH1-Nluc_1        | A GGATCC G ATGGTCTTCACACTCGAAGATTTTCGTTGGGGACTGG   |
| F-BH1-NLuc_1        | ATGGATCCATGGTCTTCACACTCGAAG                        |
| F-Hind3-koz-Nluc_1  | ATAAGCTTCGCCACCATGGTCTTCACACTCGAAG                 |
| F-ER1-Nluc_1        | AGAATTCATGGTCTTCACACTCGAAGATTTTCGTTGGGGACTGG       |
| Nluc_C166A          | GGCTGGCGGCTGGCCGAACGCATTCTG                        |
| F-Nluc_G50C         | TGCCAAAATGGGCTGAAGATC                              |
| R-Nluc_49           | GCTCAGGACAATCCTTTG                                 |
| F-Nluc_G66C         | TGCCTGAGCGGCGACCAAATG                              |
| R-Nluc_65           | TTC ATACGGGATGATGAC                                |
| F-Nluc_G97C         | TGCACACTGGTAATCGACGGG                              |
| R-Nluc_96           | ATAGTGCAGGATCACC                                   |
| F-Nluc_G136C        | TGCAACAAAATTATCGACGAGC                             |
| R-Nluc_135          | GTTCCACAGGGTCCCCTG                                 |

215

216

217

218 **Supplementary Note 1**

219 **Consideration of the insertion site of mKOκ**

220 To achieve efficient FRET from Nluc to mKOκ, we decided to insert mKOκ into the  
221 loop region of Nluc. To find the closest position of the luciferin-binding site, we  
222 substituted a glycine residue with a cysteine residue at four putative flexible loop  
223 regions of Nluc (50th, 66th, 97th, and 136th) and conjugated eosin, a yellowish orange  
224 fluorescent dye, with each cysteine residue via the maleimide functional group  
225 (**Supplementary Fig. 7a and 7b**). The Nluc conjugated with eosin at the 50th residue  
226 exhibited the highest FRET efficiency among tested constructs, suggesting that the  
227 luciferin binding site is close to the 50th residue of Nluc. Thus, we inserted mKOκ in  
228 between Gly<sub>50</sub> and Glu<sub>51</sub> of Nluc and generated a small library with flexible linker  
229 amino acids inserted at the N- and C-termini of the mKOκ domain (**Supplementary Fig.**  
230 **7c**).

231

232 **Supplementary Note 2**

233 **Estimation of photon number that single GeNL molecule emits**

234 Based on enzymatic parameters, the photon number that can be emitted by a single  
235 molecule of GeNL during camera exposure was  $590 \pm 3.8$  photons ( $3.3 \text{ photons s}^{-1} \times$   
236  $180 \text{ s}$ , mean  $\pm$  SD,  $n = 3$ ). The reported photon detection efficiency of an objective lens  
237 (NA 1.45, x100 magnification, oil immersion), similar to that used is 15% when the  
238 specimen is located at a height of 200 nm from the glass-water interface<sup>1</sup> (typical  
239 thickness of agarose used here<sup>2</sup>). Thus the number of photons reaching the camera is  
240 anticipated to be  $89 \pm 0.57$  photons (mean  $\pm$  SD). Separately, we calculated the total  
241 number of counts collected from single luminescence spots and then converted this  
242 number to the number of photons using 5.8 conversion efficiency, 1200 electron  
243 multiplication, an ADC gain setting of 5, and a quantum efficiency of 0.9 at 520 nm  
244 (ImagEM, Hamamatsu Photonics). The number of detected photons was  $75 \pm 30$   
245 photons (mean  $\pm$  SD,  $n = 919$ ).

246

247

## 248 **Supplementary Note3**

### 249 **Consideration of the insertion site for eNL-based indicators**

250 To develop a  $\text{Ca}^{2+}$  indicator based on GeNL, we adopted the intramolecular  
251 complementation of split luciferase, in which the sensor domain of a bioactive molecule  
252 is inserted into luciferase. The conformational change of the sensor domain by analyte  
253 binding induces the reconstitution of the split luciferase domains. We chose a fusion  
254 protein of calmodulin and M13 as a  $\text{Ca}^{2+}$  sensing domain. To create high-performance  
255 CSL-based indicators, it is important to design an appropriate insertion site that allows  
256 the split Luciferase to display a large dynamic range in signal change, an intensity  
257 bright enough for imaging. Thus we systematically screened and identified the  
258 appropriate sites of Nluc for CaM-M13 insertion. Through the use of transposon-based  
259 mutagenesis<sup>3</sup>, we constructed a library of Nluc gene variants that contained 15 base  
260 pairs of DNA inserted at a random location, followed by expression in *E. coli*<sup>3</sup>. We  
261 screened several thousand individual clones and picked 40 based on the luminescence  
262 signal intensity. Subsequent DNA sequencing revealed the insertion sites within the  
263 Nluc (37/38, 63/64, 69/70, 97/98, 103/104, 107/108, 121/122 and 148/149th residue) at  
264 which five amino acids were inserted without obliterating the intrinsic activity of Nluc  
265 (Supplementary Fig. 16a). Next we inserted the CaM-M13 domain into the identified  
266 sites within Nluc. As a result, CaM-M13 insertion in between Gly<sub>69</sub> and Asp<sub>70</sub> of Nluc  
267 yielded a 60% signal increase upon  $\text{Ca}^{2+}$  binding (Supplementary Fig. 16b). The  
268 construct, in which CaM-M13 was inserted in between Gly<sub>69</sub> and Asp<sub>70</sub> of the Nluc  
269 moiety in GeNL, showed almost the same signal change (60%). The spectrum profile  
270 was unchanged upon  $\text{Ca}^{2+}$  binding, indicating that the eNL-based  $\text{Ca}^{2+}$  indicator indeed  
271 used a  $\text{Ca}^{2+}$ -dependent CSL mechanism whose emission color was changed by FRET,  
272 but which was insensitive to  $\text{Ca}^{2+}$ . We searched for a more optimal insertion sites  
273 around Gly<sub>69</sub>/Asp<sub>70</sub>, and identified that the insertion in between Gly<sub>66</sub> and Leu<sub>67</sub> of the  
274 Nluc moiety in GeNL yielded a 180% signal increase upon  $\text{Ca}^{2+}$  binding  
275 (Supplementary Fig. 16c). Thus we named this construct GeNL( $\text{Ca}^{2+}$ ).

276

277

278 **Supplementary Note4**

279 Nucleotide sequences of eNL constructs used in this study are listed below. Acceptor  
280 fluorescent proteins is highlighted in yellow, Nluc highlighted in cyan, CaM-M13  
281 highlighted in green.

282

283 >CeNL

284 ATGGTGAGCAAGGGCGAGGAGCTGTTACCGGGGTGGTGCCCATCCTGGTC  
285 GAGCTGGACGGCGACGTAAACGGCCACAAGTTCAGCGTGTCCGGCGAGGGC  
286 GAGGGCGATGCCACCTACGGCAAGCTGACCCTGAAGTTCATCTGCACCACCG  
287 GCAAGCTGCCCGTGCCCTGGCCACCCTCGTGACCACCCTGTCCTGGGGCGT  
288 GCAGTGCTTCGCCCCGTACCCCGACCACATGAAGCAGCACGACTTCTTCAAG  
289 TCCGCCATGCCCGAAGGCTACGTCCAGGAGCGCACCATCTTCTTCAAGGACG  
290 ACGGCAACTACAAGACCCGCGCCGAGGTGAAGTTCGAGGGCGACACCCTGG  
291 TGAACCGCATCGAGCTGAAGGGCATCGACTTCAAGGAGGACGGCAACATCC  
292 TGGGGCACAAGCTGGAGTACA ACTACTTTAGCGACAACGTCTATATCACCGC  
293 CGACAAGCAGAAGAACGGCATCAAGGCCAACTTCAAGATCCGCCACAACAT  
294 CGAGGACGGCGGCGTGCAGCTCGCCGACCACTACCAGCAGAACACCCCAT  
295 CGGCGACGGCCCCGTGCTGCTGCCCCGACAACCACTACCTGAGCACCCAGTC  
296 CAAGCTGAGCAAAGACCCCAACGAGAAGCGCGATCACATGGTCCTGCTGGA  
297 GTTCGTGACCGCCGCGGGTTGCATACACTCGAAGATTTTCGTTGGGGACTGG  
298 CGACAGACAGCCGGCTACAACCTGGACCAAGTCCTTGAACAGGGAGGTGTG  
299 TCCAGTTTGTTCAGAATCTCGGGGTGTCCGTAACCTCCGATCCAAAGGATTGT  
300 CCTGAGCGGTGAAAATGGGCTGAAGATCGACATCCATGTCATCATCCCGTATG  
301 AAGGTCTGAGCGGCGACCAAAATGGGCCAGATCGAAAAATTTTAAGGTGG  
302 TGTACCCTGTGGATGATCATCACTTTAAGGTGATCCTGCACTATGGCACACTG  
303 GTAATCGACGGGGTTACGCCGAACATGATCGACTATTTTCGGACGGCCGTATGA  
304 AGGCATCGCCGTGTTTCGACGGCAAAAAGATCACTGTAACAGGGACCCTGTG  
305 GAACGGCAACAAAATTATCGACGAGCGCCTGATCAACCCCGACGGCTCCCTG  
306 CTGTTCCGAGTAACCATCAACGGAGTGACCGGCTGGCGGCTGTGCGAACGCA  
307 TTCTGGCGTAA

308

309 >GeNL

310 ATGGTGTCCAAGGGCGAAGAGGACAACATGGCCAGCCTGCCTGCCACCCAC  
311 GAGCTGCACATCTTCGGCAGCATCAACGGCGTGGACTTCGACATGGTGGGAC  
312 AGGGCACCGGCAACCCCAACGACGGCTACGAGGAACTGAACCTGAAGTCCA  
313 CAAAGGGCGACCTGCAGTTCAGCCCCTGGATTCTGGTGCCCCACATCGGCTA  
314 CGGCTTCCACCAGTACCTGCCCTACCCCGACGGCATGAGCCCTTTCAGGCC  
315 GCTATGGTGGATGGCAGCGGCTACCAGGTGCACCGGACCATGCAGTTTGAGG  
316 ACGGCGCCAGCCTGACCGTGAACCTACCGGTACACATACGAGGGCAGCCACAT  
317 CAAGGGCGAGGCCCAAGTGAAGGGCACAGGCTTTCAGCCGACGGCCCCGT  
318 GATGACCAATAGCCTGACAGCCGCCGACTGGTGCAGAAGCAAGAAAACCTA  
319 CCCCAATGACAAGACCATCATCAGCACCTTCAAGTGGTCTACACCACCGGC  
320 AATGGCAAGCGGTACAGAAGCACCGCCCGGACCACCTACACCTTCGCCAAA  
321 CCTATGGCCGCCAACTACCTGAAGAACCAGCCTATGTACGTGTTCCGCAAGA  
322 CCGAGCTGAAGCACTCCAAGACAGA AACTGAACTTCAAAGAGTGGCAGAAA  
323 GCCTTCAACGGGTTTGAAGATTTTCGTTGGGGACTGGCGACAGACAGCCGGCT  
324 ACAACCTGGACCAAGTCCTTGAACAGGGAGGTGTGTCCAGTTTGTTCAGAA  
325 TCTCGGGGTGTCCGTAACCTCCGATCCAAAGGATTGTCTGAGCGGTGAAAAT  
326 GGGCTGAAGATCGACATCCATGTCATCATCCCGTATGAAGGTCTGAGCGGCG



327 ACCAAATGGGCCAGATCGAAAAAATTTTAAAGGTGGTGTACCCTGTGGATGA  
328 TCATCACTTTAAGGTGATCCTGCACTATGGCACACTGGTAATCGACGGGGTTA  
329 CGCCGAACATGATCGACTATTTTCGGACGGCCGTATGAAGGCATCGCCGTGTT  
330 GACGGCAAAAAGATCACTGTAACAGGGACCCTGTGGAACGGCAACAAAATT  
331 ATCGACGAGCGCCTGATCAACCCCGACGGCTCCCTGCTGTTCCGAGTAACCA  
332 TCAACGGAGTGACCGGCTGGCGGCTGTGCGAACGCATTCTGGCGTAA

333  
334 >YeNL

335 ATGGTGAGCAAGGGCGAGGAGCTGTTACCCGGGGTGGTGCCCATCCTGGTC  
336 GAGCTGGACGGCGACGTAAACGGCCACAAGTTCAGCGTGTCCGGCGAGGGC  
337 GAGGGCGATGCCACCTACGGCAAGCTGACCCTGAAGCTGATCTGCACCACC  
338 GGCAAGCTGCCCCTGCCCTGGCCACCCTCGTGACCACCCTGGGCTACGGCC  
339 TGCAGTGCTTCGCCCGCTACCCCGACCACATGAAGCAGCACGACTTCTTCAA  
340 GTCCGCCATGCCCGAAGGCTACGTCCAGGAGCGCACCATCTTCTTCAAGGAC  
341 GACGGCAACTACAAGACCCGCGCCGAGGTGAAGTTCGAGGGCGACACCCTG  
342 GTGAACCGCATCGAGCTGAAGGGCATCGACTTCAAGGAGGACGGCAACATC  
343 CTGGGGCACAAGCTGGAGTACAACACTACAACAGCCACAACGTCTATATCACCG  
344 CCGACAAGCAGAAGAACGGCATCAAGGGCCAACCTTCAAGATCCGCCACAACA  
345 TCGAGGACGGCGGCGTGCAGCTCGCCGACCACTACCAGCAGAACACCCCCA  
346 TCGGCGACGGCCCCGTGCTGCTGCCCGACAACCACTACCTGAGCTACCAGTC  
347 CGCCCTGAGCAAAGACCCCAACGAGAAGCGCGATCACATGGTCCTGCTGGA  
348 GTTCGTGACCGCCGCGATGCTCGAAGATTCGTTGGGGACTGGCGACAGACA  
349 GCCGGCTACAACCTGGACCAAGTCCTTGAACAGGGAGGTGTGTCCAGTTTGT  
350 TTCAGAATCTCGGGGTGTCCGTAACCTCCGATCCAAGGATTGTCCTGAGCGG  
351 TGAAAATGGGCTGAAGATCGACATCCATGTCATCATCCCCTATGAAGGTCTGA  
352 GCGGCGACCAAATGGGCCAGATCGAAAAAATTTTAAAGGTGGTGTACCCTGT  
353 GGATGATCACTTTAAGGTGATCCTGCACTATGGCACACTGGTAATCGACG  
354 GGGTTACGCCGAACATGATCGACTATTTTCGGACGGCCGTATGAAGGCATCGC  
355 CGTGTTCGACGGCAAAAAGATCACTGTAACAGGGACCCTGTGGAACGGCAA  
356 CAAAATTATCGACGAGCGCCTGATCAACCCCGACGGCTCCCTGCTGTTCCGA  
357 GTAACCATCAACGGAGTGACCGGCTGGCGGCTGTGCGAACGCATTCTGGCG  
358 AA

359  
360 >OeNL

361 ATGGTCTTCACACTCGAAGATTTTCGTTGGGGACTGGCGACAGACAGCCGGCT  
362 ACAACCTGGACCAAGTCCTTGAACAGGGAGGTGTGTCCAGTTTGTTCAGAA  
363 TCTCGGGGTGTCCGTAACCTCCGATCCAAGGATTGTCCTGAGCGGTCTCGAG  
364 GGCGGTAGCGGTGGCAGCGTGAGCGTGATCAAGCCCGAGATGAAGAAGGTG  
365 GAGGACGCCGTGGCCCACTCCACTCTCGAGGGCGTGAGCGTGATCAAGCCC  
366 GAGATGAAGATGAGGTAATACTACATGGACGGCTCCGTCAATGGGCATGAGTTCA  
367 CAATCGAGGGTGAGGGCACAGGCAGACCTTACGAGGGACATCAGGAGATGA  
368 CACTGCGCGTCACAATGGCCGAGGGCGGGCCAATGCCTTTCGCCTTCGACCT  
369 GGTGTCCACGTGTTCTGTTACGGCCACAGAGTGTTTACTAAATATCCAGAAG  
370 AGATCCCAGACTATTTCAAGCAGGCCTTTCCTGAGGGCCTGTCTGGGAGAG  
371 GTCCCTGGAGTTCGAGGACGGCGGCTCCGCCTCCGTGAGCGCCACATCAG  
372 CCTGAGGGGCAACACCTTCTACCACAAGTCCAAGTTCACCGGCGTGAACTTC  
373 CCCGCCGACGGCCCCATCATGCAGAACCAGAGCGTGGACTGGGAGCCCTCC  
374 ACCGAGAAGATCACCGCCAGCGACGGCGTGCTGAAGGGCGACGTGACCATG  
375 TACCTGAAGCTGGAGGGCGGGCGGCAACCACAAGTGCCAGATGAAGACCACC  
376 TACAAGGCCGCCAAGGAGATCCTGGAGATGCCCGGCGACCACTACATCGGCC  
377 ACAGGCTGGTGAGGAAGACCGAGGGCAACATCACCGAGCAGGTGGAGGAC  
378 GCCGTGGCCCACTCCGAGCTCGAAAATGGGCTGAAGATCGACATCCATGTCA  
379 TCATCCCGTATGAAGGTCTGAGCGGCGACCAAATGGGCCAGATCGAAAAAAT  
380 TTTAAGGTGGTGTACCCTGTGGATGATCATCACTTTAAGGTGATCCTGCACT

381 ATGGCACACTGGTAATCGACGGGGTTACGCCGAACATGATCGACTATTTCCG  
382 ACGGCCGTATGAAGGCATCGCCGTGTTTCGACGGCAAAAAGATCACTGTAACA  
383 GGGACCCTGTGGAACGGCAACAAAATTATCGACGAGCGCCTGATCAACCCC  
384 GACGGCTCCCTGCTGTTCCGAGTAACCATCAACGGAGTGACCGGCTGGCGGC  
385 TGTGCGAACGCATTCTGGCG TAA

386  
387 >ReNL

388 ATGGTGAGCAAGGGCGAGGAGGTCATCAAAGAGTTCATGCGCTTCAAGGTG  
389 CGCATGGAGGGCTCCATGAACGGCCACGAGTTCGAGATCGAGGGCGAGGGC  
390 GAGGGCCGCCCTACGAGGGCACCCAGACCGCCAAGCTGAAGGTGACCAAG  
391 GGGCGCCCCCTGCCCTTCGCCTGGGACATCCTGTCCCCCAGTTCATGTACG  
392 GCTCCAAGGCGTACGTGAAGCACCCCGCCGACATCCCCGATTACAAGAAGCT  
393 GTCCTTCCCCGAGGGCTTCAAGTGGGAGCGCGTGATGAACTTCGAGGACGG  
394 CGGTCTGGTGACCGTGACCCAGGACTCCTCCCTGCAGGACGGCACGCTGATC  
395 TACAAGGTGAAGATGCGCGGCACCAACTTCCCCCCGACGGCCCCGTAATGC  
396 AGAAGAAGACCATGGGCTGGGAGGCCTCCACCGAGCGCCTGTACCCCCGCG  
397 ACGGCGTGCTGAAGGGCGAGATCCACCGGCCCTGAAGCTGAAGGACGGCG  
398 GCCACTACCTGGTGGAGTTCAAGACCATCTACATGGCCAAGAAGCCCGTGCA  
399 ACTGCCCGGCTACTACTACGTGGACACCAAGCTGGACATCACCTCCCACAAC  
400 GAGGACTACCCATCGTGGAACAGTACGAGCGCTCCGAGGGCCGCCACCAC  
401 CTGTTCCCTGGGGCATGGCACCCGGCAGCACCGGCAGCGGCAGCTCCGGCACC  
402 GCCTCCTCCGAGGACAACAACATGGCCGTCATCAAAGAGTTCATGCGCTTCA  
403 AGGTGCGCATGGAGGGCTCCATGAACGGCCACGAGTTCGAGATCGAGGGCG  
404 AGGGCGAGGGCCGCCCTACGAGGGCACCCAGACCGCCAAGCTGAAGGTG  
405 ACCAAGGGCGGCCCTTCCCTTCGCCTGGGACATCCTGTCCCCCAGTTC  
406 TGTACGGCTCCAAGGCGTACGTGAAGCACCCCGCCGACATCCCCGATTACAA  
407 GAAGCTGTCCTTCCCCGAGGGCTTCAAGTGGGAGCGCGTGATGAACTTCGA  
408 GGACGGCGGTCTGGTGACCGTGACCCAGGACTCCTCCCTGCAGGACGGCAC  
409 GCTGATCTACAAGGTGAAGATGCGCGGCACCAACTTCCCCCCGACGGCCCC  
410 GTAATGCAGAAGAAGACCATGGGCTGGGAGGCCTCCACCGAGCGCCTGTAC  
411 CCCCCGACGGCGTGCTGAAGGGCGAGATCCACCGGCCCTGAAGCTGAAG  
412 GACGGCGGCCACTACCTGGTGGAGTTCAAGACCATCTACATGGCCAAGAAG  
413 CCCGTGCAACTGCCCGGCTACTACTACGTGGACACCAAGCTGGACATCACCT  
414 CCCACAACGAGGACTACCCATCGTGGAACAGTACGAGCGCTCCGAGGGCC  
415 GCCACCACCTGTTCCGGCTGGAAGATTTTCGTTGGGGACTGGCGACAGACAG  
416 CCGGCTACAACCTGGACCAAGTCCTTGAACAGGGAGGTGTGTCCAGTTTGT  
417 TCAGAATCTCGGGGTGTCCGTAACCTCCGATCCAAAGGATTGTCCTGAGCGGT  
418 GAAAATGGGCTGAAGATCGACATCCATGTCATCATCCCGTATGAAGGTCTGA  
419 GCGGCGACCAAATGGGCCAGATCGAAAAAATTTTAAAGGTGGTGTACCCTGT  
420 GGATGATCATCACTTTAAGGTGATCCTGCACACTATGGCACACTGGTAATCGACG  
421 GGGTTACGCCGAACATGATCGACTATTTTCGGACGGCCGTATGAAGGCATCGC  
422 CGTGTTTCGACGGCAAAAAGATCACTGTAACAGGGACCCTGTGGAACGGCAA  
423 CAAAATTATCGACGAGCGCCTGATCAACCCCCGACGGCTCCCTGCTGTTCCGA  
424 GTAACCATCAACGGAGTGACCGGCTGGCGGCTGTGCGAACGCATTCTGGCG  
425 AA

426  
427 >GeNL(Ca<sup>2+</sup>)\_520

428 ATGGTGTCCAAGGGCGAAGAGGACAACATGGCCAGCCTGCCTGCCACCCAC  
429 GAGCTGCACATCTTCGGCAGCATCAACGGCGTGGACTTCGACATGGTGGGAC  
430 AGGGCACCGGCAACCCCAACGACGGCTACGAGGAACTGAACCTGAAGTCCA  
431 CAAAGGGCGACCTGCAGTTCAGCCCCTGGATTCTGGTGCCCCACATCGGCTA  
432 CGGCTTCCACCAGTACCTGCCCTACCCCGACGGCATGAGCCCTTTCCAGGCC  
433 GCTATGGTGGATGGCAGCGGCTACCAGGTGCACCGGACCATGCAGTTTGAGG  
434 ACGGCGCCAGCCTGACCGTGAACACTACCGGTACACATACGAGGGCAGCCACAT

435 CAAGGGCGAGGCCCAAGTGAAGGGCACAGGCTTTCCAGCCGACGGCCCCGT  
436 GATGACCAATAGCCTGACAGCCGCCGACTGGTGCAGAAGCAAGAAAACCTA  
437 CCCCAATGACAAGACCATCATCAGCACCTTCAAGTGGTCTACACCACCGGC  
438 AATGGCAAGCGGTACAGAAGCACCGCCCGGACCACCTACACCTTCGCCAAA  
439 CCTATGGCCGCCAACTACCTGAAGAACCAGCCTATGTACGTGTTCCGCAAGA  
440 CCGAGCTGAAGCACTCCAAGACAGAACTGAACTTCAAAGAGTGGCAGAAA  
441 GCCTTCACC GGGTTTGAAGATTTTCGTTGGGGACTGGCGACAGACAGCCGGCT  
442 ACAACCTGGACCAAGTCCTTGAACAGGGAGGTGTGTCCAGTTTGTTCAGAA  
443 TCTCGGGGTGTCCGTAACCTCCGATCCAAAGGATTGTCTGAGCGGTGAAAAT  
444 GGGCTGAAGATCGACATCCATGTCATCATCCCGTATGAAGGTCCATGGATGCA  
445 TGACCAACTGACAGAAGAGCAGATTGCAGAGTTCAAAGAAGCCTTCTCATT  
446 TTCGACAAGGATGGGGACGGCACCATCACCACAAGGGAAGTTGGCACCGTT  
447 ATGAGGTCGCTTGGACAAAACCCAACGGAAGCAGAATTGCAGGATATGATCA  
448 ATGAAGTCGATGCTGATGGCAATGGAACGATTACTTTTCTGAATTTCTTACTA  
449 TGATGGCTAGAAAAATGAAGGACACAGACAGCGAAGAGGAAATCCGAGAA  
450 GCATTCCGTGTTTTTGAACAAGGATGGGAACGGCTACATCAGCGCTGCTCAGT  
451 TACGTCACGTCATGACAAACCTCGGGGTGAAGTTAACAGATGAAGAAGTTGA  
452 TGAAATGATAAGGGAAGCAGATATCGATGGTGTGATGGCCAAGTAACTATGAA  
453 GAGTTTGAACAAATGATGACAGCAAAGGGGGGAAGAGGCGCTGGAAGAA  
454 AAACCTCATTGCCGTCAGCGCTGCCAACCGGTTCAAGAAGATCTCCAGCTCC  
455 GGGGCACTG GAGCTCCTGAGCGGCGACCAAATGGGCCAGATCGAAAAAATT  
456 TTAAAGGTGGTGTACCCTGTGGATGATCATCACTTTAAAGGTGATCCTGCACTA  
457 TGGCACACTGGTAATCGACGGGGTTACGCCGAACATGATCGACTATTTCCGGA  
458 CGGCCGTATGAAGGCATCGCCGTGTTTCGACGGCAAAAAGATCACTGTAACAG  
459 GGACCTGTGGAACGGCAACAAAATTATCGACGAGCGCCTGATCAACCCCG  
460 ACGGCTCCCTGCTGTTCCGAGTAACCATCAACGGAGTGACCGGCTGGCGGCT  
461 GTGCGAACGCATTCTGGCG TAA

462  
463 >GeNL(Ca<sup>2+</sup>)\_480

464 ATGGTGTCCAAGGGCGAAGAGGACAACATGGCCAGCCTGCCTGCCACCCAC  
465 GAGCTGCACATCTTCGGCAGCATCAACGGCGTGGACTTCGACATGGTGGGAC  
466 AGGGCACCGGCAACCCCAACGACGGCTACGAGGAACTGAACCTGAAGTCCA  
467 CAAAGGGCGACCTGCAGTTCAGCCCCTGGATTCTGGTGCCCCACATCGGCTA  
468 CGGCTTCCACCAGTACCTGCCCTACCCCGACGGCATGAGCCCTTTCAGGCC  
469 GCTATGGTGGATGGCAGCGGCTACCAGGTGCACCGGACCATGCAGTTTGAAG  
470 ACGGCGCCAGCCTGACCGTGAACCTACCGGTACACATACGAGGGCAGCCACAT  
471 CAAGGGCGAGGCCCAAGTGAAGGGCACAGGCTTTCCAGCCGACGGCCCCGT  
472 GATGACCAATAGCCTGACAGCCGCCGACTGGTGCAGAAGCAAGAAAACCTA  
473 CCCCAATGACAAGACCATCATCAGCACCTTCAAGTGGTCTACACCACCGGC  
474 AATGGCAAGCGGTACAGAAGCACCGCCCGGACCACCTACACCTTCGCCAAA  
475 CCTATGGCCGCCAACTACCTGAAGAACCAGCCTATGTACGTGTTCCGCAAGA  
476 CCGAGCTGAAGCACTCCAAGACAGAACTGAACTTCAAAGAGTGGCAGAAA  
477 GCCTTCACC GGGTTTGAAGATTTTCGTTGGGGACTGGCGACAGACAGCCGGCT  
478 ACAACCTGGACCAAGTCCTTGAACAGGGAGGTGTGTCCAGTTTGTTCAGAA  
479 TCTCGGGGTGTCCGTAACCTCCGATCCAAAGGATTGTCTGAGCGGTGAAAAT  
480 GGGCTGAAGATCGACATCCATGTCATCATCCCGTATGAAGGTCCATGGATGCA  
481 TGACCAACTGACAGAAGAGCAGATTGCAGAGTTCAAAGAAGCCTTCTCATT  
482 TTCGACAAGGATGGGGACGGCACCATCACCACAAGGGAAGTTGGCACCGTT  
483 ATGAGGTCGCTTGGACAAAACCCAACGGAAGCAGAATTGCAGGATATGATCA  
484 ATGAAGTCGATGCTGATGGCAATGGAACGATTACTTTTCTGAATTTCTTACTA  
485 TGATGGCTAGAAAAATGAAGGACACAGACAGCGAAGAGGAAATCCGAGAA  
486 GCATTCCGTGTTTTTGAACAAGGATGGGAACGGCTACATCAGCGCTGCTCAGT  
487 TACGTCACGTCATGACAAACCTCGGGGTGAAGTTAACAGATGAAGAAGTTGA  
488 TGAAATGATAAGGGAAGCAGATATCGATGGTGTGATGGCCAAGTAACTATGAA

489 GAGTTTGAACAAATGATGACAGCAAAGGGTGGCTCCAAGAGGCGCTGGAAG  
490 AAAA ACTTCATTGCCGTCAGCGCTGCCAACCGGTTCAAGAAGATCTCCAGCT  
491 CCGGGGCACTG GAGCTCCTGAGCGGCGACCAAATGGGCCAGATCGAAAAA  
492 TTTTAAAGGTGGTGTACCCTGTGGATGATCATCACTTTAAGGTGATCCTGCAC  
493 TATGGCACACTGGTAATCGACGGGGTTACGCCGAACATGATCGACTATTTTCGG  
494 ACGGCCGTATGAAGGCATCGCCGTGTTTCGACGGCAAAAAGATCACTGTAACA  
495 GGGACCCTGTGGAACGGCAACAAAATTATCGACGAGCGCCTGATCAACCCC  
496 GACGGCTCCCTGCTGTTCCGAGTAACCATCAACGGAGTGACCGGCTGGCGGC  
497 TGTGCGAACGCATTCTGGCG TAA

498

499 >GeNL(Ca<sup>2+</sup>)\_250

500 ATGGTGTCCAAGGGCGAAGAGGACAACATGGCCAGCCTGCCTGCCACCCAC  
501 GAGCTGCACATCTTCGGCAGCATCAACGGCGTGGACTTCGACATGGTGGGAC  
502 AGGGCACCGGCAACCCCAACGACGGCTACGAGGAACTGAACCTGAAGTCCA  
503 CAAAGGGCGACCTGCAGTTCAGCCCCTGGATTCTGGTGCCCCACATCGGCTA  
504 CGGCTTCCACCAGTACCTGCCCTACCCCGACGGCATGAGCCCTTTCAGGCC  
505 GCTATGGTGGATGGCAGCGGCTACCAGGTGCACCGGACCATGCAGTTTGAGG  
506 ACGGCGCCAGCCTGACCGTGA ACTACCGGTACACATACGAGGGCAGCCACAT  
507 CAAGGGCGAGGCCCAAGTGAAGGGCACAGGCTTTCAGCCGACGGCCCCGT  
508 GATGACCAATAGCCTGACAGCCCGCCGACTGGTGCAGAAGCAAGAAAACCTA  
509 CCCC AATGACAAGACCATCATCAGCACCTTCAAGTGGTCTACACCACCGGC  
510 AATGGCAAGCGGTACAGAAGCACCGCCCGGACCACCTACACCTTCGCCAAA  
511 CCTATGGCCGCAACTACCTGAAGAACCAGCCTATGTACGTGTTCCGCAAGA  
512 CCGAGCTGAAGCACTCCAAGACAGA ACTGAACTTCAAAGAGTGGCAGAAA  
513 GCCTTCAACGGGTTTGAAGATTTTCGTTGGGGACTGGCGACAGACAGCCGGCT  
514 ACAACCTGGACCAAGTCCTTGAACAGGGAGGTGTGTCCAGTTTGTTCAGAA  
515 TCTCGGGGTGTCCGTA ACTCCGATCCA AAGGATTGTCTGAGCGGTGAAAAT  
516 GGGCTGAAGATCGACATCCATGTCATCATCCCGTATGAAGGTCCATGGATGCA  
517 TGACCAACTGACAGAAGAGCAGATTGCAGAGTTCAAAGAAGCCTTCTCATT  
518 TTCGACAAGGATGGGGACGGCACCATCACCACAAGGGA ACTTGGCACC GTT  
519 ATGAGGTCGCTTGGACAAAACCCAACGGAAGCAGAATTGCAGGATATGATCA  
520 ATGAAGTCGATGCTGATGGCAATGGAACGATTTACTTTCCTGAATTTCTTACTA  
521 TGATGGCTAGAAAAATGAAGGACACAGACAGCGAAGAGGAAATCCGAGAA  
522 GCATTCCGTGTTTTTGACAAGGATGGGAACGGCTACATCAGCGCTGCTCAGT  
523 TACGTCACGTCATGACAAAACCTCGGGGTGAAGTTAACAGATGAAGAAGTTGA  
524 TGAAATGATAAGGGAAGCAGATATCGATGGTGTATGGCCAAGTAACTATGAA  
525 GAGTTTGAACAAATGATGACAGCAAAGGGAGGTGGCTCCAAGAGGCGCTGG  
526 AAGAAAACTTCATTGCCGTCAGCGCTGCCAACCGGTTCAAGAAGATCTCCA  
527 GCTCCGGGGCACTG GAGCTCCTGAGCGGCGACCAAATGGGCCAGATCGAAA  
528 AAATTTTAAAGGTGGTGTACCCTGTGGATGATCATCACTTTAAGGTGATCCTG  
529 CACTATGGCACACTGGTAATCGACGGGGTTACGCCGAACATGATCGACTATTT  
530 CGGACGGCCGTATGAAGGCATCGCCGTGTTTCGACGGCAAAAAGATCACTGTA  
531 ACAGGGACCCTGTGGAACGGCAACAAAATTATCGACGAGCGCCTGATCAAC  
532 CCCGACGGCTCCCTGCTGTTCCGAGTAACCATCAACGGAGTGACCGGCTGGC  
533 GGCTGTGCGAACGCATTCTGGCG TAA

534

535 >GeNL(Ca<sup>2+</sup>)\_60

536 ATGGTGTCCAAGGGCGAAGAGGACAACATGGCCAGCCTGCCTGCCACCCAC  
537 GAGCTGCACATCTTCGGCAGCATCAACGGCGTGGACTTCGACATGGTGGGAC  
538 AGGGCACCGGCAACCCCAACGACGGCTACGAGGAACTGAACCTGAAGTCCA  
539 CAAAGGGCGACCTGCAGTTCAGCCCCTGGATTCTGGTGCCCCACATCGGCTA  
540 CGGCTTCCACCAGTACCTGCCCTACCCCGACGGCATGAGCCCTTTCAGGCC  
541 GCTATGGTGGATGGCAGCGGCTACCAGGTGCACCGGACCATGCAGTTTGAGG  
542 ACGGCGCCAGCCTGACCGTGA ACTACCGGTACACATACGAGGGCAGCCACAT

543 CAAGGGCGAGGCCCAAGTGAAGGGCACAGGCTTTCCAGCCGACGGCCCCGT  
544 GATGACCAATAGCCTGACAGCCGCCGACTGGTGCAGAAGCAAGAAAACCTA  
545 CCCCAATGACAAGACCATCATCAGCACCTTCAAGTGGTCTACACCACCGGC  
546 AATGGCAAGCGGTACAGAAGCACCGCCCGGACCACCTACACCTTCGCCAAA  
547 CCTATGGCCGCCAACTACCTGAAGAACCAGCCTATGTACGTGTTCCGCAAGA  
548 CCGAGCTGAAGCACTCCAAGACAGAAGTGAAGTTCAAAGAGTGGCAGAAA  
549 GCCTTCACC GGGTTTGAAGATTCGTTGGGGACTGGCGACAGACAGCCGGCT  
550 ACAACCTGGACCAAGTCCTTGAACAGGGAGGTGTGTCCAGTTTGTTCAGAA  
551 TCTCGGGGTGTCCGTAACCTCCGATCCAAAGGATTGTCTGAGCGGTGAAAAT  
552 GGGCTGAAGATCGACATCCATGTCATCATCCCGTATGAAGGTCCATGGATGCA  
553 TGACCAACTGACAGAAGAGCAGATTGCAGAGTTCAAAGAAGCCTTCTCATT  
554 TTCGACAAGGATGGGGACGGCACCATCACCACAAGGGAAGTGGCACCGTT  
555 ATGAGGTCGCTTGGACAAAACCCAACGGAAGCAGAATTGCAGGATATGATCA  
556 ATGAAGTCGATGCTGATGGCAATGGAACGATTACTTTCTTCTACTACTA  
557 TGATGGCTAGAAAAATGAAGGACACAGACAGCGAAGAGGAAATCCGAGAA  
558 GCATTCCGTGTTTTTGACAAGGATGGGAACGGCTACATCAGCGCTGCTGAAT  
559 TACGTCACGTCATGACAAACCTCGGGGTGAAGTTAACAGATGAAGAAGTTGA  
560 TGAAATGATAAGGGAAGCAGATATCGATGGTGTGATGGCCAAGTAAACTATGAA  
561 GAGTTTGAACAAATGATGACAGCAAAGGGGGGAGGTGGCTCCAAGAGGCGC  
562 TGGAAGAAAAACTTCATTGCCGTCAGCGCTGCCAACCGGTTCAAGAAGATCT  
563 CCAGCTCCGGGGCACTG GAGCTCCTGAGCGGCGACCAAATGGGCCAGATCG  
564 AAAAAATTTTAAAGGTGGTGTACCCTGTGGATGATCATCACTTTAAGGTGATC  
565 CTGCACTATGGCACACTGGTAATCGACGGGGTTACGCCGAACATGATCGACTA  
566 TTTCGGACGGCCGTATGAAGGCATCGCCGTGTTTCGACGGCAAAAAGATCACT  
567 GTAACAGGGACCCTGTGGAACGGCAACAAAATTATCGACGAGCGCCTGATC  
568 AACCCCGACGGCTCCCTGCTGTTCCGAGTAACCATCAACGGAGTGACCGGCT  
569 GGCGGCTGTGCGAACGCATTCTGGCGTAA

570

## 571 **Supplementary References**

- 572 1. Leutenegger, M. & Lasser, T. Detection efficiency in total internal reflection  
573 fluorescence microscopy. *Opt Express* **16**, 8519-8531 (2008).
- 574 2. Watanabe, R. et al. Biased Brownian stepping rotation of FoF1-ATP synthase driven  
575 by proton motive force. *Nat Commun* **4**, 1631 (2013).
- 576 3. Li, Y., Sierra, A.M., Ai, H.W. & Campbell, R.E. Identification of sites within a  
577 monomeric red fluorescent protein that tolerate peptide insertion and testing of  
578 corresponding circular permutations. *Photochem Photobiol* **84**, 111-119 (2008).

579

580

581

582
